# Supplementary material for: Estimation of net muscle volume in patients with muscular dystrophy using muscle CT for prospective muscle volume analysis: an observational study
Source: PubMed Central journal article supplement — BMJ Open. 2013 Oct 31;3(10):e003603. doi: 10.1136/bmjopen-2013-003603 (PMC3816239; doi:10.1136/bmjopen-2013-003603), 2013-10-31
Supplement: bmjopen-2013-003603.draft_revisions.pdf [file bmjopen-2013-003603.draft_revisions.pdf]

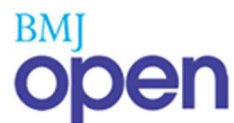

**Measurement of net muscle volume in patients with  
muscular dystrophy using muscle CT for prospective muscle  
volume analysis**

|                                    |                                                                                                                                                                                                                                                                                           |
|------------------------------------|-------------------------------------------------------------------------------------------------------------------------------------------------------------------------------------------------------------------------------------------------------------------------------------------|
| Journal:                           | <i>BMJ Open</i>                                                                                                                                                                                                                                                                           |
| Manuscript ID:                     | bmjopen-2013-003603                                                                                                                                                                                                                                                                       |
| Article Type:                      | Research                                                                                                                                                                                                                                                                                  |
| Date Submitted by the Author:      | 16-Jul-2013                                                                                                                                                                                                                                                                               |
| Complete List of Authors:          | Nakayama, Takahiro; Yokohama Rosai Hospital, Neurology<br>Kuru, Satoshi; NHO Suzuka Hospital, Neurology<br>Okura, Masashi; TANITA Body Weight Scientific Institute,<br>Motoyoshi, Yoshifumi; NHO Shimoshizu Hospital, Neurology<br>Kawai, Mitsuru; NHO Higashisaitama Hospital, Neurology |
| <b>Primary Subject<br>Heading</b>: | Neurology                                                                                                                                                                                                                                                                                 |
| Secondary Subject Heading:         | Radiology and imaging, Research methods                                                                                                                                                                                                                                                   |
| Keywords:                          | Neuromuscular disease < NEUROLOGY, Neuroradiology < NEUROLOGY,<br>Neurology < INTERNAL MEDICINE                                                                                                                                                                                           |
|                                    |                                                                                                                                                                                                                                                                                           |

SCHOLARONE™  
Manuscripts

TITLE: Measurement of net muscle volume in patients with muscular dystrophy using muscle CT for prospective muscle volume analysis

AUTHORS:

T. Nakayama, M.D. <sup>\*)</sup>, S. Kuru, M.D. <sup>\*\*)</sup>, M. Okura, M.Sci. <sup>\*\*\*)</sup>,  
Y. Motoyoshi, M.D. <sup>\*\*\*\*)</sup>, M. Kawai, M.D. <sup>\*\*\*\*\*)</sup>

<sup>\*)</sup> Department of Neurology, Yokohama Rosai Hospital.

3211, Kozukue, Kouhoku-ku, Yokohama, Kanagawa 222-0036, Japan

<sup>\*\*)</sup> Department of Neurology, NHO Suzuka Hospital, Japan,

<sup>\*\*\*)</sup> TANITA Body Weight Scientific Institute, Japan,

<sup>\*\*\*\*)</sup> Department of Neurology, NHO Shimoshizu Hospital, Japan,

<sup>\*\*\*\*\*)</sup> Department of Neurology, NHO Higashisaitama Hospital, Japan

Telephone : +81-45-474-8111

Fax : +81-45-474-8110

E-mail; [tnakayama-tky@umin.ac.jp](mailto:tnakayama-tky@umin.ac.jp)

Key Words:

muscular dystrophy, muscle volumetry, outcome measure, CT, DXA

Word Count 2490 words

References: 16

Figures: 6, Table: 1

All correspondence should be sent to T. Nakayama addressed above.

Nakayama T, et al.

## Abstract

### Objective:

Muscle volume in patients with muscle disease is an index of disease progression. The aim of this study is to show a new method of muscle volumetry using CT of thigh muscles.

### Subjects

1. For muscle volumetry using CT and DXA, 13 patients with muscle disease participated.
2. For prospective CT volumetry, 12 patients participated for 4 years.

### Methods:

- 1.a. Helical CT scanner imaging of the thigh was performed. CT images were analyzed applying estimated functions, and the accumulation of outcomes resulted in muscle volumes.
- 1.b. Pencil beam DXA was used in these patients and the muscle mass of the thigh was calculated by the attached software.
2. To prospectively compare muscle volumes, CT images of the mid-thigh were measured. We referred to this method as net muscle volumetry.

### Results:

- 1.a. Muscle volumes of the thigh on one side were calculated as between 300 and 3400 cm<sup>3</sup> by CT.
- 1.b. Muscle masses of the thigh calculated from DXA were estimated at between 1100 and 5000 g. Results closely corresponded to muscle volumes calculated by CT with an interclass correlation coefficient of 0.993.
2. Thigh net muscle volumes of 7 patients who complained of gait disturbance decreased in four years ( $p < 0.01$ ).

1  
2  
3 Conclusions:  
4

5 Measurement of net muscle volume using CT, which was validated by the muscle  
6 mass calculated from DXA, was developed. Net muscle volume decrements during  
7 four years supported the reliability of this method. This less arbitrary method is  
8 suitable for assessment of muscle volume in patients with muscular dystrophy.  
9  
10  
11  
12

13 (250 words)  
14  
15  
16  
17  
18  
19  
20  
21  
22  
23  
24  
25  
26  
27  
28  
29  
30  
31  
32  
33  
34  
35  
36  
37  
38  
39  
40  
41  
42  
43  
44  
45  
46  
47  
48  
49  
50  
51  
52  
53  
54  
55  
56  
57  
58  
59  
60

For peer review only

## Article Summary

### Article focus

- ✓ Muscle volume in patients with muscle disease is an index of disease progression and the efficacy of therapy, but muscle volumetry in which the muscle volume decrease could be shown in the patients with muscular dystrophies during several years has not been conducted so far.
- ✓ There were some reports which showed estimated muscle volume were correlated to muscle power or functional rating scale in patients with muscular dystrophy using CT, MRI and DXA(dual energy X-ray absorptiometry).
- ✓ We proposed a method of muscle volumetry using our own estimating function to muscle CT images in patients with muscular diseases. And we demonstrated the long-term applicable method by calculating constant zones. And we called our method as net muscle volumetry.

### Key messages

- ✓ The muscle volume using our method are closely correlated to the muscle mass using DXA, and the decrement of muscle volume are corresponded to the aggravation of muscle functional classification. These findings validated our method.
- ✓ We demonstrated the net muscle volume decrease or consistency during four years, and that also supported the reliability of this method.
- ✓ In this study, muscle was mostly automatically differentiated with the estimating function applying CT values of image pixels, except for manual elimination of skin or vessels. . This less arbitrary method is suitable for assessment of muscle volume in patients with muscular dystrophy under clinical treatment trials and will become a strong clinical outcome measure for disease progression.

### Strengths and limitations of this study

- ✓ CT are capable of acquiring muscle images of all patients within a short time, and are adaptable to patients who cannot keep still in MRI scanners, such as mentally retarded patients or those with claustrophobia.

Nakayama T, et al.

- ✓ We refer to the results as net muscle volume, because we calculated a 14cm section of the middle part of the thigh.
- ✓ There are problems with X-ray exposure to patients
- ✓ We cannot evaluate the net muscle volume less than 300 cm<sup>3</sup>.
- ✓ We cannot distinguish muscle from connective tissue accurately.

## Introduction

Muscle volume in patients with muscle disease is an index of disease progression and the efficacy of therapy. Although muscle volume can be measured in healthy people using CT [1], MRI [2], DXA (dual energy X-ray absorptiometry) [3], and bio-impedance analysis [4], muscle volumetry in patients with muscular dystrophies has not been conducted.

Patients' respiratory dysfunction and spinal scoliosis made it difficult to establish muscle volumetry using underwater weighting [5] or bio-impedance analysis [4]. Muscular tissue where muscular fibers were mixed with fat also caused difficulty distinguishing between the two components using imaging methods.

An increase of signal intensity of T1 weighted images which suggested increased fat in the muscle of patients with Duchenne muscular dystrophy was reported [6]. And the qualified MR grades and clinical functional grades progression were well correlated [7], but the muscle volumetry, in which the muscle volume decrement were shown in the patients with muscular dystrophies during several years, were not established.

Estimation of the concentration of fat using DIXON sequence on MRI has been reported, however, the concentration of muscle was not calculated using this method and muscle volume was not estimated [8-10]

CSA (cross sectional area analysis) [11, 12] using CT showed that the muscular cross sectional area of the middle section of the thigh corresponded well to muscle power and volume; however, accurate muscle volume could not be estimated due to the coexistence of muscle fibers and fat tissue in the same muscle bundles of patients with

Nakayama T, et al.

1  
2  
3  
4 muscular dystrophies.

5 Although the histogram of CT values in the thigh muscle showed peaks in muscle CT  
6 values in non-neuromuscular disease patients or very mild muscular dystrophy  
7 patients, the peak of the histogram shifted to fat CT values according to disease  
8 progression [13]. Intermediate CT values between fat and muscle CT values  
9 corresponded to the concentration ratio of muscle fibers and fat tissue in muscle tissue.  
10 Recently, the main object of muscle volumetry was to distinguish muscle from fat [12,  
11 13], and voxels which showed intermediate CT values were not investigated.

12  
13  
14  
15  
16  
17  
18  
19  
20  
21  
22  
23  
24  
25  
26  
27  
28  
29  
30  
31  
32  
33  
34  
35  
36  
37  
38  
39  
40  
41  
42  
43  
44  
45  
46  
47  
48  
49  
50  
51  
52  
53  
54  
55  
56  
57  
58  
59  
60  
The method to distinguish the two tissues by standard CT values may underestimate  
muscle volume, because muscle tissue which was mixed with fat tissue and  
represented lower CT values than standard muscle CT values was totally excluded  
[12] (Figure 1). The method to separate muscle from fat anatomically also did not  
deal with muscle tissue mixed with fat because the method was developed for healthy  
people or athletes [13].

In this study, we proposed a method of estimating muscle volume in muscle tissue  
mixed with fat tissue using CT in patients with muscular diseases. We determined  
standard CT values of muscle and fat in helical CT and developed a new method to  
measure muscle volume using our estimation function in patients' thigh muscles,  
where skeletal muscle mainly contributes to daily functions, such as walking, and  
could be imaged easily using CT. We compared results from this new method to  
DXA analysis and the disability classification of the muscle disease. Finally, we  
modified the method to a long-term applicable method by calculating constant zones.  
As we limited the calculating partition and the results were not accurate thigh muscle  
volumes, we referred to this method as *net* muscle volumetry. In order to ascertain  
the usefulness of this novel method of diseased muscle volumetry, we prospectively  
followed 14 muscular dystrophy patients and recognized progressive net muscle  
volume decreases.

Subjects

Nakayama T, et al.

1  
2  
3  
4  
5  
6  
7  
8  
9  
10  
11  
12  
13  
14  
15  
16  
17  
18  
19  
20

## 1. Standard CT values of muscle

Abdominal CT images of 114 non-neuromuscular disease patients, who had been scanned using CT for abdominal pain using a TOSHIBA multi-detector CT scanner, aged between 20 and 30 years old (average 24 +/- 3.52(SD)) were used to evaluate muscle and fat CT values in Yokohama Rosai Hospital. They were studied according to the Human Research Guidelines of the Internal Ethical Review Board of Yokohama Rosai Hospital. Abdominal organs and muscles surrounding the abdominal cavity were not obviously impaired in these images. The section that an umbilicus was included in was evaluated.

## 2. Muscle volumetry using CT and DXA

21  
22  
23  
24  
25  
26  
27  
28  
29  
30  
31  
32  
33  
34  
35  
36  
37  
38  
39  
40  
41  
42  
43  
44  
45  
46  
47  
48  
49  
50  
51  
52  
53  
54  
55  
56  
57  
58  
59  
60

Thirteen patients (facioscapulohumeral muscular dystrophy (FSH): 4, type 1 myotonic dystrophy (MyD): 6, limb-girdle muscular dystrophy (LGMD): 2, inclusion body myositis (IBM): 1), (male 11, female 2) aged between 19 and 67 years old (average: 52.7 +/- 14.7(SD)) participated in this study in 2007 at Yokohama Rosai Hospital, NHO Suzuka Hospital, NHO Shimoshizu Hospital, and NHO Higashisaitama Hospital. All patients were clinically or pathologically diagnosed. They were studied according to the Human Research Guidelines of the Internal Ethical Review Board of Yokohama Rosai Hospital and the National Hospital Organization. They agreed to this study and assigned with their signature. Their clinical disability stage was determined on the Ueda's motor disability classification, which was widely used in patients with muscular dystrophies in Japan [14]. The original report of UEDA disability classification was published in Japanese and was not listed on PubMed database, therefore we showed the correspondence list of the UEDA functional disability stage and the leg grading scale of Vignos functional rating scale (Table 1) [15]. A priori number of patients analyzed by correlation coefficient was estimated using G\*power (<http://www.psych.uni-duesseldorf.de/abteilungen/aap/gpower3/>; effect size = 0.5,  $\alpha$  error probability = 0.05, power = 0.8 ), and it was presumed as 26



limbs of 13 patients.

### 3. Prospective net muscle volumetry using CT

Twelve patients (FSH: 3, MyD: 3, bulbospinal muscular atrophy: 2, IBM: 2, LGMD: 1, periodic paralysis 1), (male 9, female 3) aged between 31 and 66 years old (50.67 +/- 13.1(SD)) participated for 4 years (2007-2010) at Yokohama Rosai Hospital and NHO Suzuka Hospital. They also agreed to participate in our study.

## Methods

### 1. Standard CT values of muscle

To determine standard CT values of muscle and fat, muscular CT values of paravertebral and iliopsoas muscles and fatty CT values of subcutaneous fat were obtained.

### 2a. Muscle volumetry using CT

#### *CT Data Acquisition*

Data were acquired by TOSHIBA® and HITACHI® multi detector CT scanners (from 4 to 64 detectors). CT imaging was performed between the great trochanter and patella with a 1-cm slice thickness, 512x512 matrix, and 120 kV tube voltage.

#### *CT Analysis*

- 1) DICOM files between the great trochanter and patella were obtained from the image server.
- 2) According to our standard CT values of muscle and fat, the minimum (min) standard CT value, which was the average minus 2 SD (standard deviation), and maximum (max) standard CT value, which was the average plus 2 SD, were determined for each tissue. Voxels with CT values between the min and max standard muscle CT value and between the min and max standard fat CT value were assumed to be muscle and fat tissue, respectively. The other voxels with CT values between the max standard fat CT value and min standard muscle CT

Nakayama T, et al.

value, or between the max standard muscle CT value and max standard muscle CT value plus (the min standard muscle CT value minus max standard fat CT value) were assumed to be the complex tissue of muscle and fat, or muscle and other tissues, respectively. We estimated muscle density function as muscle ratio=

$$\frac{(\text{CT value of the voxel} - \text{max standard fat CT value})}{(\text{min standard muscle CT value} - \text{max standard fat CT value})}$$

[max standard fat CT value  $\leq$  CT value of the voxel  $<$  min standard muscle CT],

1

[min standard muscle CT  $\leq$  CT value of the voxel  $<$  max standard muscle CT],  
and

$$\frac{(- \text{CT value of the voxel} + \text{max standard muscle CT} + (\text{min standard muscle CT value} - \text{max standard fat CT value}))}{(\text{min standard muscle CT value} - \text{max standard fat CT value})}$$

[max standard muscle CT  $\leq$  CT value of the voxel  $<$  max standard muscle CT + (min standard muscle CT value - max standard fat CT value)]. (Figure 2)

On MATLAB®, we applied the estimated function to the DICOM image, assigned the obtained muscle density to an 8 bit scale, and wrote an 8 bit gray scale TIFF image file. (Figure 3)

3) Obviously different structures from muscle were eliminated on the density map using Adobe Photoshop®.

4) Post processing density map files were collected on MATLAB® and muscle volume was calculated from a total summation of muscle density multiplied by voxel size.

## 2b. Muscle volumetry using DXA

### *DXA Data Acquisition*

Data were acquired by Lunar® pencil beam type DXA scanners (DPX-LIQ, GE Lunar) and whole body DXA scans was executed.

### *DXA Analysis*

Muscle mass was calculated from manually segmented thigh parts of data on attached software with DXA (DPX-L software Version 1.3). We calculated fat, lean mass, and bone and regarded the lean mass as the muscle mass, according to a previous report [3].

## 3. Prospective net muscle volumetry using CT

To compare results over several years, muscle volumes of the 14cm section of the middle part of the thigh, between 7cm above and below the midpoint of the trochanter and patella, were measured for 4 years. We referred to this volume as net muscle volume.

We used SPSS® 20 for statistical analysis.

## Results

### 1. Standard CT values of muscle

Standard CT values of muscle and fat were determined to be 56.3 +/- 11.3 (2 SD) and -98.3 +/- 22.8 (2 SD), respectively.

### 2. Muscle volumetry using CT and DXA

Muscle volume of the thigh on one side was calculated as between 300 and 3400 cm<sup>3</sup> by CT, and these volumes correlated to the muscle strength of these legs.

Muscle mass of the thigh calculated from DXA was also estimated at between 1100 and 5000 g. A regression line between muscle mass and muscle volume estimated that: muscle mass (g) = 1.23 x muscle volume (cm<sup>3</sup>) + 731 (g). The two results closely corresponded to one another with a Pearson's correlation coefficient of 0.993 (p=0.000), an interclass correlation coefficient (ICC(3, 1)) of 0.970, and a standard error of measurement (SEM) of 79.06 cm<sup>3</sup> in a Bland-Altman plot.

Nakayama T, et al.

(Figure 4)

As the Ueda's disability classification of the lower extremities worsened, standardized muscle volume, which were muscle volume of thigh divided by square of body height[16], decreased with a Spearman's correlation coefficient of 0.767 ( $p=0.000$ ). (Figure 5) In addition, the ratio of muscle volume divided by the distance between the trochanter and patella was highly correlated with the muscle square at the center of the thigh, with a Pearson's correlation coefficient of 0.978 ( $p=0.000$ ). A regression line between muscle volume of the thigh and central muscle area estimated that: muscle volume of the thigh ( $\text{cm}^3$ ) =  $(12.1 \times$  central cross sectional muscle area – 9.66)  $\times$  length between the great trochanter and patella

### 3. Prospective net muscle volumetry using CT

Net thigh muscle volume in 7 patients who complained of gait disturbance decreased in this period. The rate of decrease was 8.54 %/year ( $p=0.000$  by a paired t-test). This rate led to a 41.0 % reduction in muscle volume in ten years. Net volume in 5 patients, who did not complain, did not decline ( $p=0.372$  by a paired t-test, reduction rate was 0.39 %/year).

## Discussion

A method to measure muscle volume based on CT, which was validated by muscle mass calculated using DXA, was developed. It also validated this method that the decrease of muscle volume was closely related to the aggravation of muscle functional classification. The inclination of the regression line between muscle volume from CT and muscle mass from DXA was calculated as 1.23 and represented the density of the muscle. It closely followed the specific gravity of the muscle, which was 1.17 [17], and also supported the probability of the calculation results. Demonstration of muscle volume decrease or consistency during four years also supported the reliability of this method.

1  
2  
3 The CT scanner is a widely used imaging tool and muscle images can be obtained in  
4 a short time. Although there are problems with X-ray exposure for patients, we can  
5 scan muscle CT images of a patient who cannot keep still in MRI scanners, such as  
6 mentally retarded patients or those with claustrophobia.  
7  
8

9  
10  
11 In this study, muscle was not anatomically or manually distinguished from other  
12 tissues, but was mostly automatically differentiated with the estimating function  
13 applying CT values of image pixels. In contrast, in DXA analysis, it is easy to make  
14 an error during manual procedures of segmentation of the thigh from the trunk. It  
15 was suggested that our approximately automatic process was superior to DXA  
16 analysis. This less arbitrary method is suitable for assessment of muscle volume in  
17 patients with muscular dystrophy under clinical treatment trials and will become a  
18 strong clinical outcome measure for disease progression of patients with muscular  
19 dystrophies. However, there was limitation of this net volumetry. We cannot  
20 evaluate the net muscle volume less than 300 cm<sup>3</sup>, because in the images of the  
21 patients whose net muscle volume under 300 cm<sup>3</sup>, muscle tissue was almost changed  
22 to fat.  
23  
24

25  
26  
27 In this prospective *net* muscle volumetry, we calculated a 14cm section of the  
28 middle part of the thigh, between 7cm above and below the midpoint of the trochanter  
29 and patella, thereby minimizing spatial errors. For muscle volume, when measuring  
30 all sections between the trochanter and patella, the elimination of genital organs and  
31 tendons may lead to manual errors between examiners. On repeated examination, a  
32 difference in the number of slices between scans may occur, and a difference in the  
33 number of slices may cause fluctuations in muscle volume by several percentage (1/30  
34 - 1/20, i.e. 3-5 %). On the other hand, the summation of a few slices will lead to  
35 positional differences between scans; therefore, we confirmed the number of slices as  
36 much as possible from our experiences. In addition, we decided to calculate the  
37 sections, because the diameter of the thigh was not so different between upper and  
38 bottom slices at the middle part of the thigh.  
39  
40  
41  
42  
43  
44  
45  
46  
47  
48  
49  
50  
51  
52  
53  
54  
55  
56  
57

58 Slice thickness was determined as 10 mm similarly to cadaver thigh MRI and CT  
59  
60

1  
2  
3 scans [18] and proportionally to 3 mm slice thickness in mice volumetry using CT  
4 [19]. To minimize manual procedures, the numbers of slices should be reduced and  
5 slice thickness should be as thick as possible.  
6  
7

8  
9 We determined the estimating linear function in the form of linear symmetry and as  
10 a median with muscle CT values on the histogram of CT values of images, because  
11 muscle and fat peaks on the histogram of CT values of non-muscular disease patients  
12 seemed to be normally distributed [20].  
13  
14

15  
16 Although decreases or consistencies in net muscle volume were measured by our  
17 method, the accurate separation of muscle from connective tissue was impossible for  
18 the similar CT values of muscle and connective tissue. It was supposed that muscle  
19 tissue experiences fatty changes, but intramuscular connective tissue may not  
20 significantly increase within a year.  
21  
22

23  
24 In addition, for child patients, evaluation of disease progression will be estimated by  
25 the residual muscle ratio: net muscle volume divided by net muscle volume +  
26 intrafascial fat volume in the middle part of the thigh, where muscle cross sectional  
27 area (CSA) was closely correlated to muscle volume of the thigh [12].  
28  
29

30  
31 Finally, as muscle volume was different between patients according to their height,  
32 weight, and other factors, muscle volumes must be used not for comparison between  
33 patients, but as an index of the efficacy of therapies or of the progression of disease in  
34 one patient.  
35  
36

### 37 38 39 40 41 42 43 44 Acknowledgements

45  
46 This study was supported by Research Program on Neurological Diseases of  
47 the Japan Ministry of Health, Labour, and Welfare, grant number (20B-12).  
48  
49

50  
51  
52 (2882 words)  
53  
54  
55  
56  
57  
58  
59  
60

## Contributorship Statement

T Nakayama, S Kuru, Y Motoyoshi and M Kawai contributed to all of this study.  
M Okura contributed to the muscle volumetry using DXA.

## Data Sharing

There are not any persons who share our data or our additional unpublished data.



## References

- 1) Chowdhury B, Sjostrom L, Alpsten M, et al.; A multicompartiment body composition technique base on computed tomography. *Int J Obes Relat Metab Disord.* 18: 219-234, 1994
- 2) Lönn L, Starck G, Alpsten M, et al.; Determination of tissue volumes. A comparison between CT and MR imaging. *Acta Radiol.* 40: 314-321, 1999
- 3) Heymsfield SB, Smith R, Aulet M, et al.; Appendicular skeletal muscle mass: measurement by dual-photon absorptiometry. *Am J Clin Nutr* 52: 214-218, 1990
- 4) Miyatani M, Kanehisa H, Masuo Y, et al.; Validity of estimating limb muscle volume by bioelectrical impedance. *J Appl Physiol* 91: 386-394, 2001
- 5) Brodie DA; Techniques of measurement of body composition. Part I. *Sports Med* 5: 11-40, 1988
- 6) Garrood P, Hollingsworth KG, Eagle M, et.al.; MR imaging in Duchenne muscular dystrophy: quantification of T1-weighted signal, contrast uptake, and the effects of exercise. *J Magn Reson Imaging* 30: 1130-8, 2009
- 7) Liu GC, Jong YJ, Chiang CH, et.al.; Duchenne muscular dystrophy: MR grading system with functional correlation. *Radiology* 186: 475-80, 1993
- 8) Wren TAL, Bluml S, Tseng-Ong L, et.al. ; Three-point technique of fat quantification of muscle tissue as a marker of disease progression in Duchenne muscular dystrophy: preliminary study. *AJR* 190: W8–W12, 2008
- 9) Fischmann A, Hafner P, Gloor M, et.al.; Quantitative MRI and loss of free ambulation in Duchenne muscular dystrophy. *J Neurol.* 260: 969-74, 2013
- 10) Wokke BH, Bos C, Reijnierse M, et.al.; Comparison of dixon and T1-weighted MR methods to assess the degree of fat infiltration in duchenne muscular dystrophy patients. *J Magn Reson Imaging.* 2013 Jan 4. doi:10.1002/jmri.23998.
- 11) Maughan RJ, Watson JS, Weir J; Strength and cross-sectional area of human skeletal muscle. *J Physiol* 338: 37-49, 1983
- 12) Liu M, Chino N, Ishihara T; Muscle damage progression in Duchenne muscular dystrophy evaluated by a new quantitative computed tomography method.

Nakayama T, et al.



- 1  
2  
3 Arch Phys Med Rehabil 74: 507-514, 1993  
4  
5 13) Tames-Pena J, Parker KJ, Totterman S; Unsupervised statistical segmentation  
6 of multispectral volumetric MR images. Proceedings of SPIE – The international  
7 Society for Optical Engineering Medical Imaging '99. Image Processing 3661:  
8 300-311, 1999  
9  
10  
11  
12 14) Shimizu J, Matsumura K, Kawai M, et.al.; X-ray CT of Duchenne muscular  
13 dystrophy skeletal muscles--chronological study for five years. Rinsho  
14 Shinkeigaku. 31: 953-9, 1991  
15  
16  
17 15) Vignos PJ, Archibald KC; Maintenance of ambulation in childhood muscular  
18 dystrophy. Chronic Dis. 12: 273-90, 1960  
19  
20  
21 16) Baumgartner R, Koehler K, Gallagher D, et al.; Epidemiology of sarcopenia  
22 among the elderly in New Mexico. Am J Epidemiol 147: 755-763, 1998  
23  
24  
25 17) Melanie GU, Elisa BP, Loree KK, et al.; Specific fore deficit in skeletal muscle  
26 of old rats is partially explained by the existence of denervated muscle fibers. J  
27 Gerontol A Biol Sci Med Sci 56: B191-B197, 2001  
28  
29  
30  
31 18) Mitsiopoulos N, Baumgartner RN, Heymsfield SB, et al.; Cadaver validation  
32 of skeletal muscle measurement by magnetic resonance imaging and computerized  
33 tomography. J Appl Physiol 85: 115-122, 1998  
34  
35  
36  
37 19) Ross R, Leger L, Guardo R, et al.; Adipose tissue volume measurement by  
38 magnetic resonance imaging and computerized tomography in rats. J Appl Physiol  
39 70: 2164-2172, 1991  
40  
41  
42  
43 20) Nakayama T, Kuru S, Kawai M; Analysis using histograms of muscle CT  
44 images in patients with Duchenne muscular dystrophy. BMJ Case Reports 2013;  
45 doi:10.1136/bcr-2013-009301  
46  
47  
48  
49  
50  
51  
52  
53  
54  
55  
56  
57  
58  
59  
60

| Ueda's motor disability classification based on Japanese lifestyle |                                                                                                     | The leg grading scale of Vignos functional rating scale |                                                                                                    |
|--------------------------------------------------------------------|-----------------------------------------------------------------------------------------------------|---------------------------------------------------------|----------------------------------------------------------------------------------------------------|
| Stage 1                                                            | Able to walk: Able to climb the stairs without assistance (without using a handrail)                | Grade 1                                                 | Walks and climbs stairs without assistance.                                                        |
| Stage 2                                                            | Assistance (e.g., handrail) is necessary for climbing the stairs.                                   | Grade 2                                                 | Walks and climbs stairs with aid of railing.                                                       |
|                                                                    |                                                                                                     | Grade 3.                                                | Walks and climbs stairs slowly with aid of railing (over 25 seconds for eight standard steps).     |
| Stage 3                                                            | Unable to climb stairs: able to walk on a flat surface: able to stand up from a normal-height chair | Grade 4                                                 | Walks unassisted but cannot climb stairs or get out of chair.                                      |
| Stage 4                                                            | Able to walk on a flat surface: unable to stand up from a chair                                     | Grade 5                                                 | Walks unassisted but cannot rise from chair or climb stairs.                                       |
| Stage 5                                                            | Unable to walk: able to crawl on four limbs                                                         | Grade 6                                                 | Walks only with assistance or walks independently with long leg braces.                            |
| Stage 6                                                            | Unable to crawl on four limbs but able to crawl in another pattern                                  | Grade 7                                                 | Walks in long leg braces but requires assistance for balance.                                      |
| Stage 7                                                            | Unable to crawl but able to maintain a sitting position by oneself                                  | Grade 8                                                 | Stands in long leg braces but unable to walk even with assistance.                                 |
| Stage 8                                                            | Unable to maintain a sitting position by oneself; total assistance is necessary                     | Grade 9                                                 | Wheelchair or bed bound; can only perform limited activities involving lower arm and hand muscles. |

Table 1: Ueda's motor disability classification based on Japanese lifestyle and the leg grading scale of Vignos functional rating scale

## Figure Legends

### Figure 1: Estimation of muscle volume using only standard CT values

The voxels, whose CT values were between 40 and 65, were estimated for muscle tissue according to a previously reported method. This patient with progressive muscular dystrophy was able to walk with a cane, but he could not walk obviously in this presumed muscle tissue image.

### Figure 2: Estimation of muscle volume from voxels

This figure showed an estimation of muscle volume from voxels where muscle and fat coexists. CT values of voxels, composed of muscle and fat, depended on the ratio of the two components. The histogram showed CT values of the thigh, and the two peaks of fat and muscle were shown. At a CT value of -75, the pixel included 0% muscle, and at a CT value of 45, the pixel included 100% muscle. The two points were connected with a linear function, this was then fit to the histogram, and, as a result, muscle density was obtained. This linear function was linearly symmetrically transferred to the other side of the muscle peak of the CT value.

### Figure 3: Process of calculating muscle volume

These images were calculated from DIOOM data. Muscle is shown. We deleted obvious vessels and skin tissues manually from the density map, resulting in a muscle volume map of the thigh. Accumulation of outcomes resulted in muscle volume.

### Figure 4: Correlation between muscle volumes calculated from CT and muscle mass from DXA

Results from DXA and CT are plotted. These results corresponded well with a Pearson's correlation coefficient of 0.993, interclass correlation coefficient (ICC(3,1)) of 0.970. The regression line was; muscle volume (CT) = 0.80 x muscle mass (DXA) - 561 (cm<sup>3</sup>), muscle mass (DXA) = 1.23 x muscle volume (CT) + 731 (g), Bland Altman plot between the results of the regression function substituted by muscle

Nakayama T, et al.

1  
2  
3 mass from DXA and the muscle volume calculated from CT showed no additional nor  
4 proportional error and a standard error of measurement(SEM) of 79.06 cm<sup>3</sup>.  
5  
6  
7

8  
9 Figure 5: Correlation between muscle volume and disability stage  
10

11 As Ueda's disability classification based on Japanese style in the lower extremities  
12 deteriorates, standardized muscle volume (muscle volume divided by square of body  
13 height) decreases with a Spearman's correlation coefficient of 0.767. The leg grading  
14 scale of Vignos functional rating scale was also shown.  
15  
16  
17  
18  
19

20  
21 Figure 6: Prospective net muscle volumetry in four years  
22

23 During these four years, thigh muscle volumes in 7 patients who complained of gait  
24 disturbance decreased in this period (p=0.000). The rate of decrease was at a rate of  
25 8.54 % / year. The volume in 5 patients, who did not complain, did not decline  
26 significantly (p=0.372).  
27  
28  
29  
30  
31  
32  
33  
34  
35  
36  
37  
38  
39  
40  
41  
42  
43  
44  
45  
46  
47  
48  
49  
50  
51  
52  
53  
54  
55  
56  
57  
58  
59  
60

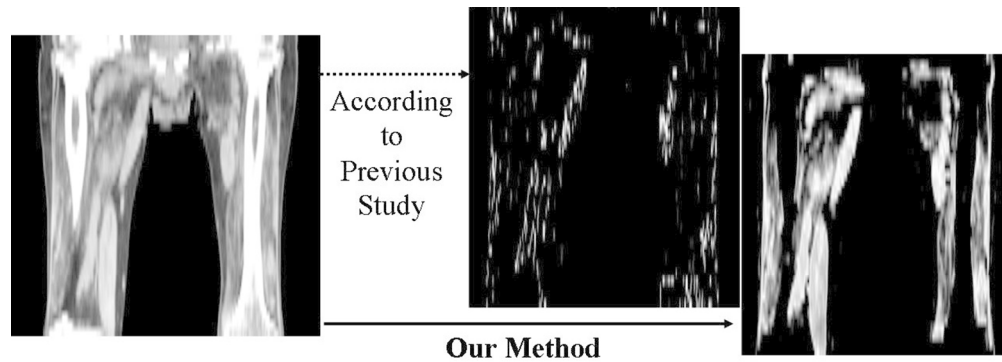

20 Estimation of muscle volume using only standard CT values

21 The voxels, whose CT values were between 40 and 65, were estimated for muscle tissue according to a  
22 previously reported method. This patient with progressive muscular dystrophy was able to walk with a  
23 cane, but he could not walk obviously in this presumed muscle tissue image.

24 338x120mm (96 x 96 DPI)

25  
26  
27  
28  
29  
30  
31  
32  
33  
34  
35  
36  
37  
38  
39  
40  
41  
42  
43  
44  
45  
46  
47  
48  
49  
50  
51  
52  
53  
54  
55  
56  
57  
58  
59  
60

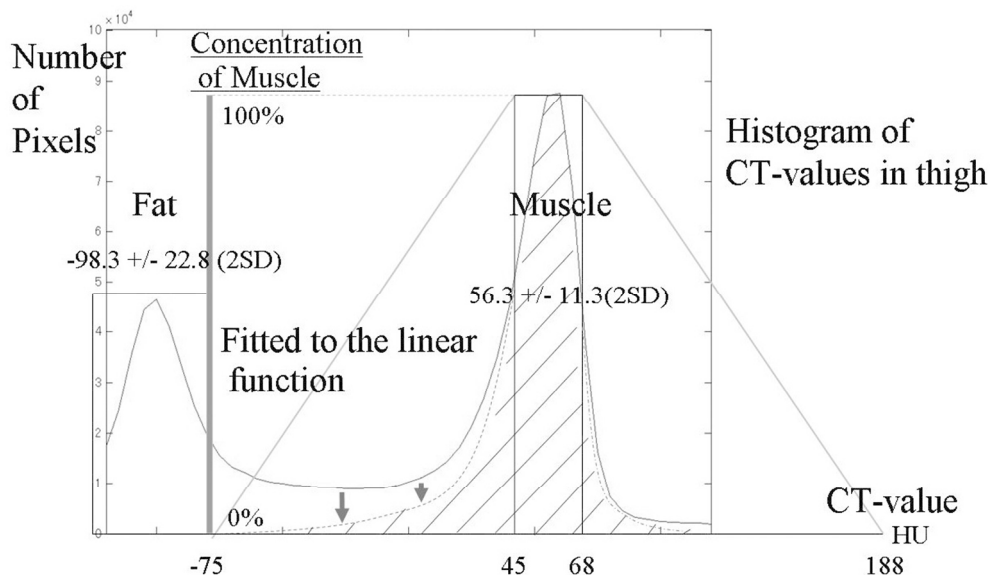

#### Estimation of muscle volume from voxels

This figure showed an estimation of muscle volume from voxels where muscle and fat coexists. CT values of voxels, composed of muscle and fat, depended on the ratio of the two components. The histogram showed CT values of the thigh, and the two peaks of fat and muscle were shown. At a CT value of -75, the pixel included 0% muscle, and at a CT value of 45, the pixel included 100% muscle. The two points were connected with a linear function, this was then fit to the histogram, and, as a result, muscle density was obtained. This linear function was linearly symmetrically transferred to the other side of the muscle peak of the CT value.

323x186mm (96 x 96 DPI)

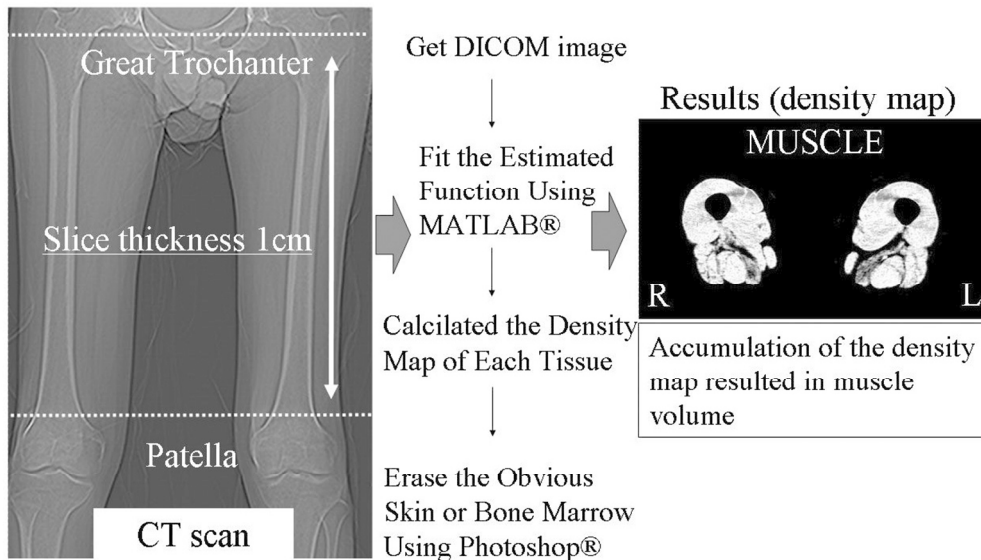

Process of calculating muscle volume

These images were calculated from DIOOM data. Muscle is shown. We deleted obvious vessels and skin tissues manually from the density map, resulting in a muscle volume map of the thigh. Accumulation of outcomes resulted in muscle volume.

332x188mm (96 x 96 DPI)

Review only

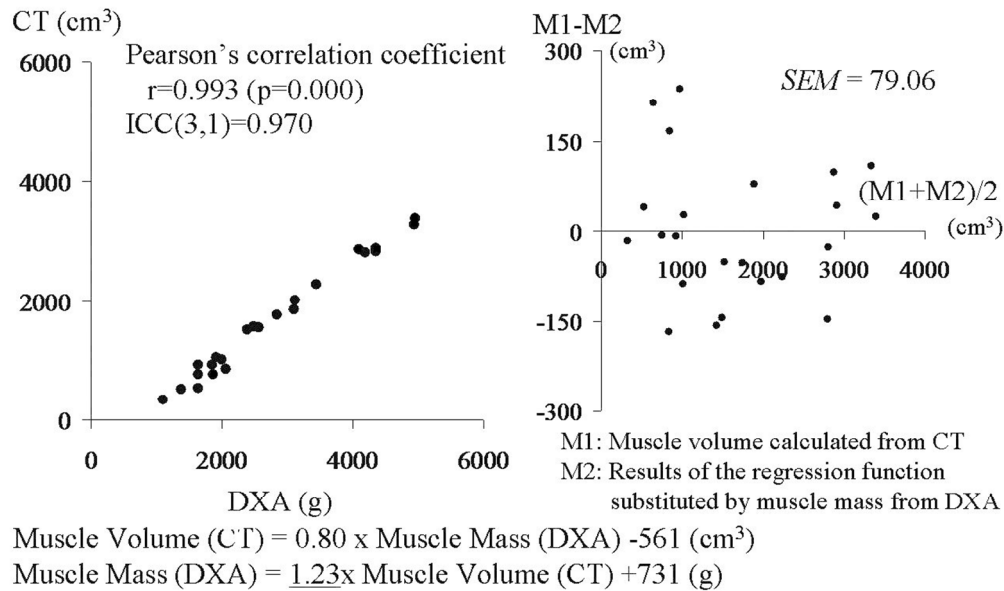

27  
28  
29  
30  
31  
32  
33  
34  
35  
36  
37  
38  
39  
40  
41  
42  
43  
44  
45  
46  
47  
48  
49  
50  
51  
52  
53  
54  
55  
56  
57  
58  
59  
60

Correlation between muscle volumes calculated from CT and muscle mass from DXA  
Results from DXA and CT are plotted. These results corresponded well with a Pearson's correlation coefficient of 0.993, interclass correlation coefficient (ICC(3,1)) of 0.970. The regression line was; muscle volume (CT) = 0.80 x muscle mass (DXA) - 561 (cm<sup>3</sup>), muscle mass (DXA) = 1.23 x muscle volume (CT) + 731 (g), Bland Altman plot between the results of the regression function substituted by muscle mass from DXA and the muscle volume calculated from CT showed no additional nor proportional error and a standard error of measurement (SEM) of 79.06 cm<sup>3</sup>.  
338x201mm (96 x 96 DPI)



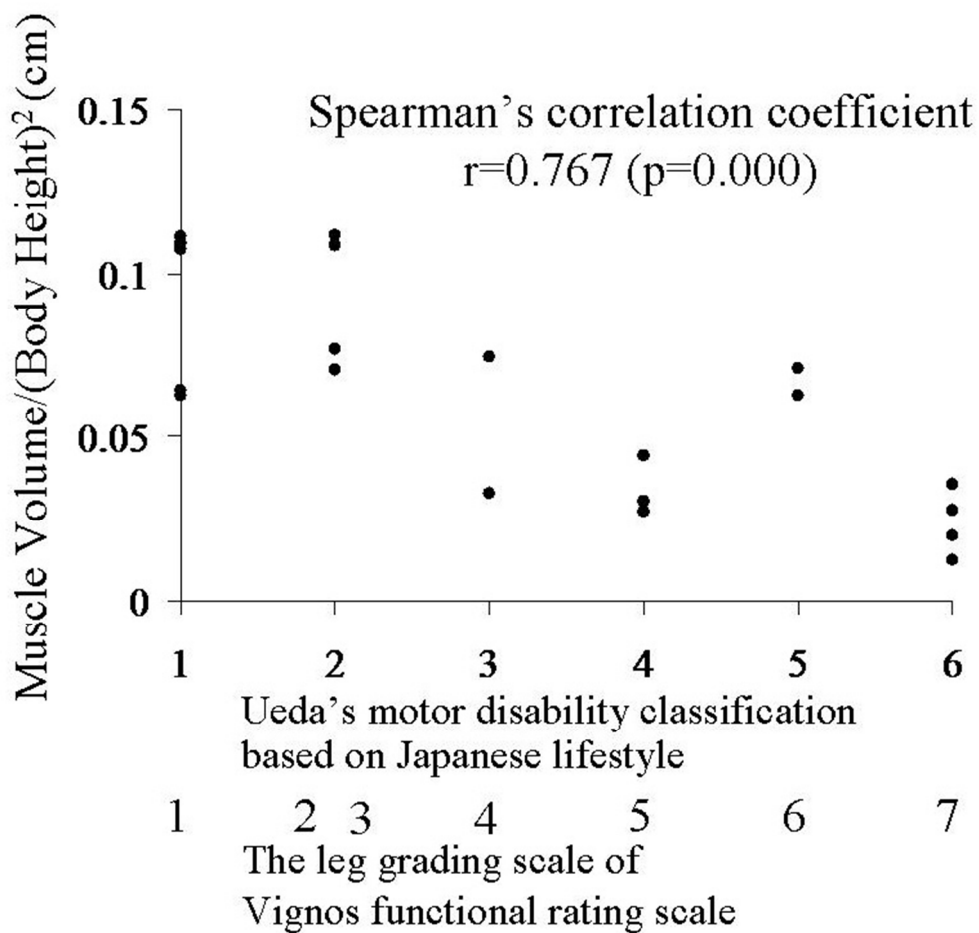

Correlation between muscle volume and disability stage  
 As Ueda's disability classification based on Japanese style in the lower extremities deteriorates, standardized muscle volume (muscle volume divided by square of body height) decreases with a Spearman's correlation coefficient of 0.767. The leg grading scale of Vignos functional rating scale was also shown.  
 205x194mm (96 x 96 DPI)

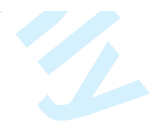

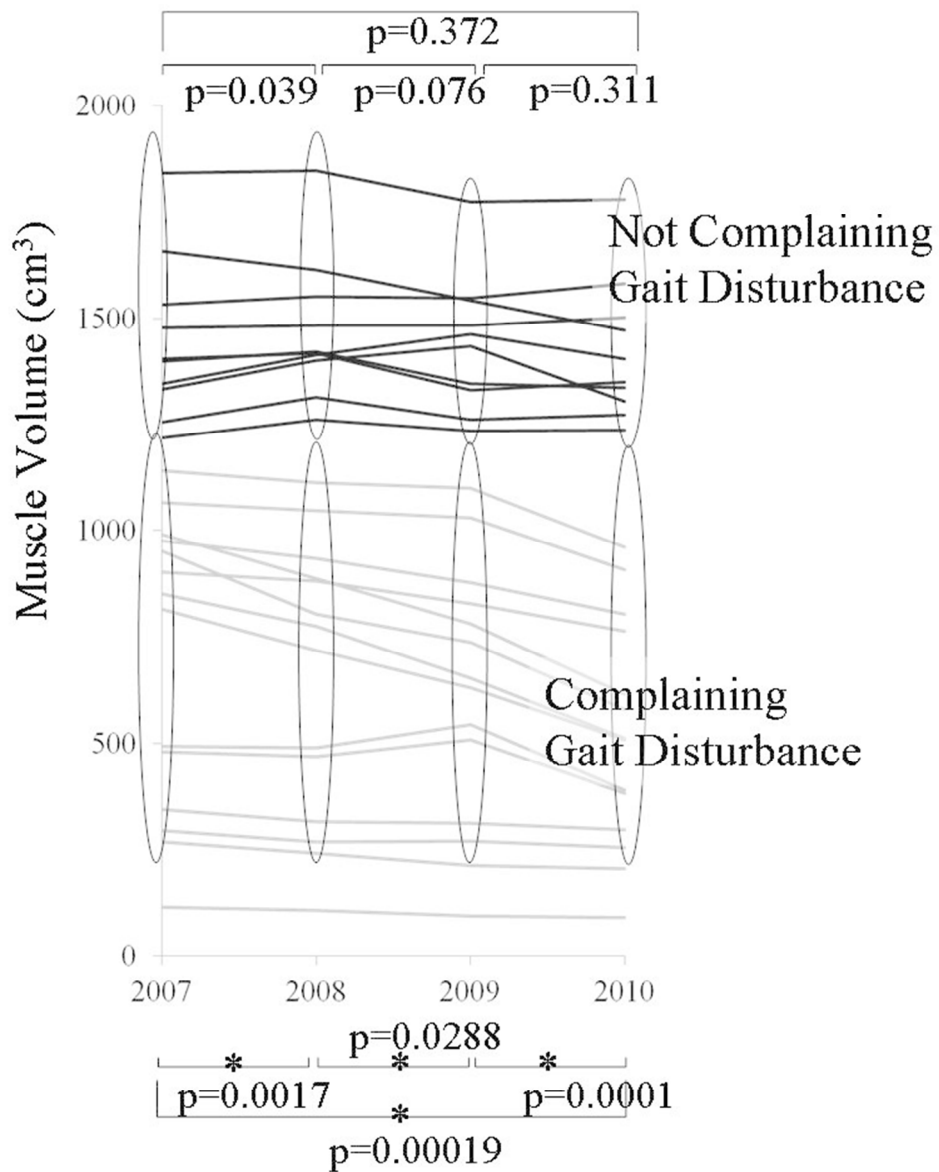

Prospective net muscle volumetry in four years  
 During these four years, thigh muscle volumes in 7 patients who complained of gait disturbance decreased in this period ( $p=0.000$ ). The rate of decrease was at a rate of 8.54 % / year. The volume in 5 patients, who did not complain, did not decline significantly ( $p=0.372$ ).  
 202x253mm (96 x 96 DPI)

## STROBE Statement—checklist of items that should be included in reports of observational studies

|                              | Item No | Recommendation                                                                                                                                                                                                                                                                                                                                                                                                                                                                                                                                                                                                                                                                                   |
|------------------------------|---------|--------------------------------------------------------------------------------------------------------------------------------------------------------------------------------------------------------------------------------------------------------------------------------------------------------------------------------------------------------------------------------------------------------------------------------------------------------------------------------------------------------------------------------------------------------------------------------------------------------------------------------------------------------------------------------------------------|
| <b>Title and abstract</b>    | 1       | (a) Indicate the study's design with a commonly used term in the title or the abstract<br>(b) Provide in the abstract an informative and balanced summary of what was done and what was found                                                                                                                                                                                                                                                                                                                                                                                                                                                                                                    |
| <b>Introduction</b>          |         |                                                                                                                                                                                                                                                                                                                                                                                                                                                                                                                                                                                                                                                                                                  |
| Background/rationale         | 2       | Explain the scientific background and rationale for the investigation being reported                                                                                                                                                                                                                                                                                                                                                                                                                                                                                                                                                                                                             |
| Objectives                   | 3       | State specific objectives, including any prespecified hypotheses                                                                                                                                                                                                                                                                                                                                                                                                                                                                                                                                                                                                                                 |
| <b>Methods</b>               |         |                                                                                                                                                                                                                                                                                                                                                                                                                                                                                                                                                                                                                                                                                                  |
| Study design                 | 4       | Present key elements of study design early in the paper                                                                                                                                                                                                                                                                                                                                                                                                                                                                                                                                                                                                                                          |
| Setting                      | 5       | Describe the setting, locations, and relevant dates, including periods of recruitment, exposure, follow-up, and data collection                                                                                                                                                                                                                                                                                                                                                                                                                                                                                                                                                                  |
| Participants                 | 6       | (a) <i>Cohort study</i> —Give the eligibility criteria, and the sources and methods of selection of participants. Describe methods of follow-up<br><i>Case-control study</i> —Give the eligibility criteria, and the sources and methods of case ascertainment and control selection. Give the rationale for the choice of cases and controls<br><i>Cross-sectional study</i> —Give the eligibility criteria, and the sources and methods of selection of participants<br>(b) <i>Cohort study</i> —For matched studies, give matching criteria and number of exposed and unexposed<br><i>Case-control study</i> —For matched studies, give matching criteria and the number of controls per case |
| Variables                    | 7       | Clearly define all outcomes, exposures, predictors, potential confounders, and effect modifiers. Give diagnostic criteria, if applicable                                                                                                                                                                                                                                                                                                                                                                                                                                                                                                                                                         |
| Data sources/<br>measurement | 8*      | For each variable of interest, give sources of data and details of methods of assessment (measurement). Describe comparability of assessment methods if there is more than one group                                                                                                                                                                                                                                                                                                                                                                                                                                                                                                             |
| Bias                         | 9       | Describe any efforts to address potential sources of bias                                                                                                                                                                                                                                                                                                                                                                                                                                                                                                                                                                                                                                        |
| Study size                   | 10      | Explain how the study size was arrived at                                                                                                                                                                                                                                                                                                                                                                                                                                                                                                                                                                                                                                                        |
| Quantitative variables       | 11      | Explain how quantitative variables were handled in the analyses. If applicable, describe which groupings were chosen and why                                                                                                                                                                                                                                                                                                                                                                                                                                                                                                                                                                     |
| Statistical methods          | 12      | (a) Describe all statistical methods, including those used to control for confounding<br>(b) Describe any methods used to examine subgroups and interactions<br>(c) Explain how missing data were addressed<br>(d) <i>Cohort study</i> —If applicable, explain how loss to follow-up was addressed<br><i>Case-control study</i> —If applicable, explain how matching of cases and controls was addressed<br><i>Cross-sectional study</i> —If applicable, describe analytical methods taking account of sampling strategy<br>(e) Describe any sensitivity analyses                                                                                                                                |

Continued on next page

1  
2  
3  
4  
5  
6  
7  
8  
9  
10  
11  
12  
13  
14  
15  
16  
17  
18  
19  
20  
21  
22  
23  
24  
25  
26  
27  
28  
29  
30  
31  
32  
33  
34  
35  
36  
37  
38  
39  
40  
41  
42  
43  
44  
45  
46  
47  
48  
49  
50  
51  
52  
53  
54  
55  
56  
57  
58  
59  
60

| <b>Results</b>           |                                                                                                                                                                                                                                                                                                                                                                                                                  |
|--------------------------|------------------------------------------------------------------------------------------------------------------------------------------------------------------------------------------------------------------------------------------------------------------------------------------------------------------------------------------------------------------------------------------------------------------|
| Participants             | 13* (a) Report numbers of individuals at each stage of study—eg numbers potentially eligible, examined for eligibility, confirmed eligible, included in the study, completing follow-up, and analysed<br>(b) Give reasons for non-participation at each stage<br>(c) Consider use of a flow diagram                                                                                                              |
| Descriptive data         | 14* (a) Give characteristics of study participants (eg demographic, clinical, social) and information on exposures and potential confounders<br>(b) Indicate number of participants with missing data for each variable of interest<br>(c) <i>Cohort study</i> —Summarise follow-up time (eg, average and total amount)                                                                                          |
| Outcome data             | 15* <i>Cohort study</i> —Report numbers of outcome events or summary measures over time<br><i>Case-control study</i> —Report numbers in each exposure category, or summary measures of exposure<br><i>Cross-sectional study</i> —Report numbers of outcome events or summary measures                                                                                                                            |
| Main results             | 16 (a) Give unadjusted estimates and, if applicable, confounder-adjusted estimates and their precision (eg, 95% confidence interval). Make clear which confounders were adjusted for and why they were included<br>(b) Report category boundaries when continuous variables were categorized<br>(c) If relevant, consider translating estimates of relative risk into absolute risk for a meaningful time period |
| Other analyses           | 17 Report other analyses done—eg analyses of subgroups and interactions, and sensitivity analyses                                                                                                                                                                                                                                                                                                                |
| <b>Discussion</b>        |                                                                                                                                                                                                                                                                                                                                                                                                                  |
| Key results              | 18 Summarise key results with reference to study objectives                                                                                                                                                                                                                                                                                                                                                      |
| Limitations              | 19 Discuss limitations of the study, taking into account sources of potential bias or imprecision. Discuss both direction and magnitude of any potential bias                                                                                                                                                                                                                                                    |
| Interpretation           | 20 Give a cautious overall interpretation of results considering objectives, limitations, multiplicity of analyses, results from similar studies, and other relevant evidence                                                                                                                                                                                                                                    |
| Generalisability         | 21 Discuss the generalisability (external validity) of the study results                                                                                                                                                                                                                                                                                                                                         |
| <b>Other information</b> |                                                                                                                                                                                                                                                                                                                                                                                                                  |
| Funding                  | 22 Give the source of funding and the role of the funders for the present study and, if applicable, for the original study on which the present article is based                                                                                                                                                                                                                                                 |

\*Give information separately for cases and controls in case-control studies and, if applicable, for exposed and unexposed groups in cohort and cross-sectional studies.

**Note:** An Explanation and Elaboration article discusses each checklist item and gives methodological background and published examples of transparent reporting. The STROBE checklist is best used in conjunction with this article (freely available on the Web sites of PLoS Medicine at <http://www.plosmedicine.org/>, Annals of Internal Medicine at <http://www.annals.org/>, and Epidemiology at <http://www.epidem.com/>). Information on the STROBE Initiative is available at [www.strobe-statement.org](http://www.strobe-statement.org).



**Estimation of net muscle volume in patients with muscular dystrophy using muscle CT for prospective muscle volume analysis: observation study**

|                                 |                                                                                                                                                                                                                                                                                           |
|---------------------------------|-------------------------------------------------------------------------------------------------------------------------------------------------------------------------------------------------------------------------------------------------------------------------------------------|
| Journal:                        | <i>BMJ Open</i>                                                                                                                                                                                                                                                                           |
| Manuscript ID:                  | bmjopen-2013-003603.R1                                                                                                                                                                                                                                                                    |
| Article Type:                   | Research                                                                                                                                                                                                                                                                                  |
| Date Submitted by the Author:   | 10-Sep-2013                                                                                                                                                                                                                                                                               |
| Complete List of Authors:       | Nakayama, Takahiro; Yokohama Rosai Hospital, Neurology<br>Kuru, Satoshi; NHO Suzuka Hospital, Neurology<br>Okura, Masashi; TANITA Body Weight Scientific Institute,<br>Motoyoshi, Yoshifumi; NHO Shimoshizu Hospital, Neurology<br>Kawai, Mitsuru; NHO Higashisaitama Hospital, Neurology |
| <b>Primary Subject Heading</b>: | Neurology                                                                                                                                                                                                                                                                                 |
| Secondary Subject Heading:      | Radiology and imaging, Research methods                                                                                                                                                                                                                                                   |
| Keywords:                       | Neuromuscular disease < NEUROLOGY, Neuroradiology < NEUROLOGY, Neurology < INTERNAL MEDICINE                                                                                                                                                                                              |
|                                 |                                                                                                                                                                                                                                                                                           |

SCHOLARONE™  
Manuscripts

TITLE: Estimation of net muscle volume in patients with muscular dystrophy using muscle CT for prospective muscle volume analysis: observation study

AUTHORS:

T. Nakayama, M.D. <sup>\*)</sup>, S. Kuru, M.D. <sup>\*\*)</sup>, M. Okura, M.Sci. <sup>\*\*\*)</sup>,  
Y. Motoyoshi, M.D. <sup>\*\*\*\*)</sup>, M. Kawai, M.D. <sup>\*\*\*\*\*)</sup>

<sup>\*)</sup> Department of Neurology, Yokohama Rosai Hospital.

3211, Kozukue, Kouhoku-ku, Yokohama, Kanagawa 222-0036, Japan

<sup>\*\*)</sup> Department of Neurology, NHO Suzuka Hospital, Japan,

<sup>\*\*\*)</sup> TANITA Body Weight Scientific Institute, Japan,

<sup>\*\*\*\*)</sup> Department of Neurology, NHO Shimoshizu Hospital, Japan,

<sup>\*\*\*\*\*)</sup> Department of Neurology, NHO Higashisaitama Hospital, Japan

Telephone : +81-45-474-8111

Fax : +81-45-474-8110

E-mail; [tnakayama-tky@umin.ac.jp](mailto:tnakayama-tky@umin.ac.jp)

Key Words:

muscular dystrophy, muscle volumetry, outcome measure, CT, DXA

Word Count 3033 words

References: 22

Figures: 6, Table: 1

All correspondence should be sent to T. Nakayama addressed above.

Nakayama T, et al.

1  
2  
3 Abstract

4  
5 Objectives:

6  
7 Muscle volume in patients with muscle disease is an index of disease progression.  
8  
9 The aim of this study is to show a new method of muscle volumetry using CT of thigh  
10  
11 muscles.  
12

13  
14  
15 Design:

16  
17 Observation study  
18  
19

20  
21 Participants:

- 22  
23 1. For muscle volumetry using CT and DXA, 13 patients with muscle disease  
24 participated.  
25  
26 2. For prospective CT volumetry, 12 patients participated for 4 years.  
27  
28

29  
30 Primary and secondary outcome measures:

31  
32 To establish the new CT volumetry, whose results were correlated to the muscle mass  
33 calculated from DXA (primary outcome). To show the decrease of muscle volume  
34 using our method over 4 years (secondary outcome)  
35  
36  
37  
38

39  
40 Methods:

- 41  
42 1. Helical CT imaging of the thigh was performed. CT images were analyzed  
43 applying estimated functions, and the accumulation of outcomes resulted in  
44 muscle volumes. We refer to this method as net muscle volumetry.  
45 Simultaneously, DXA was used in these patients and the muscle mass of the thigh  
46 was calculated by vendor provided software.  
47  
48 2. To evaluate longitudinal changes of muscle volumes, net muscle volumetry at  
49 14-cm section of the middle part of thigh were performed repeatedly over a 4 years  
50 period.  
51  
52  
53  
54  
55  
56  
57  
58  
59  
60

1  
2  
3  
4 Results:

- 5  
6 1. Muscle volumes of the thigh on one side were calculated as between 300 and 3400  
7 cm<sup>3</sup> by CT. Muscle masses of the thigh calculated from DXA were estimated at  
8 between 1100 and 5000 g. These results closely corresponded to each other with  
9 Pearson's correlation coefficient of 0.993.  
10  
11  
12  
13 2. Thigh net muscle volumes of 7 patients who complained of gait disturbance  
14 decreased over four years (p<0.01).  
15  
16  
17  
18

19 Conclusions:

20  
21 Measurement of net muscle volume using CT, which was validated by the muscle  
22 mass calculated from DXA, was developed. Net muscle volume decrements over  
23 four years supported the reliability of this method. This less arbitrary method is  
24 suitable for assessment of muscle volume in patients with muscular dystrophy.  
25  
26  
27

28 (300 words)  
29  
30  
31  
32  
33  
34  
35  
36  
37  
38  
39  
40  
41  
42  
43  
44  
45  
46  
47  
48  
49  
50  
51  
52  
53  
54  
55  
56  
57  
58  
59  
60



## Article Summary

### Article focus

- ✓ Muscle volume in patients with muscle disease is an index of disease progression and the efficacy of therapy, but muscle volumetry in which the muscle volume decreases could be shown in the patients with muscular dystrophies during several years has not been conducted thus far.
- ✓ There were some reports which showed estimated muscle volume were correlated to muscle power or functional rating scale in patients with muscular dystrophy using CT, MRI and DXA(dual energy X-ray absorptiometry).
- ✓ We proposed a method of muscle volumetry using our own estimating function to muscle CT images in patients with muscular diseases. And we demonstrated the long-term applicable method by calculating constant zones. And we called our method as net muscle volumetry.
- ✓ We measured muscle volume in patients' thigh muscles, where skeletal muscle mainly contributes to daily functions, using net muscle volumetry.

### Key messages

- ✓ The muscle volume calculated by our method, that is net muscle volumetry, are closely correlated to the muscle mass using DXA, and the decrement of muscle volume are corresponded to the aggravation of muscle functional classification. These findings validated our method.
- ✓ We demonstrated the net muscle volume decrease or consistency over four years, and that also supported the reliability of this method.
- ✓ In this study, muscle was mostly automatically differentiated with the estimating function applying CT values of image pixels, except for manual elimination of skin or vessels. . This less arbitrary method is suitable for assessment of muscle volume in patients with muscular dystrophy under clinical treatment trials and will become a strong clinical outcome measure for disease progression.

### Strengths and limitations of this study

- ✓ CT are capable of acquiring muscle images of all patients within a short time, and

Nakayama T, et al.

are adaptable to patients who cannot keep still in MRI scanners, such as mentally retarded patients or those with claustrophobia.

- ✓ There are problems with X-ray exposure to patients
- ✓ We cannot evaluate the net muscle volume less than 300 cm<sup>3</sup>.
- ✓ We cannot distinguish muscle from connective tissue accurately.

## Introduction

Muscle volume in patients with muscle disease is an index of disease progression and the efficacy of therapy. Although muscle volume can be measured in healthy people using CT [1], MRI [2], DXA (dual energy X-ray absorptiometry) [3], and bio-impedance analysis [4], muscle volumetry in patients with muscular dystrophies has not been conducted.

Patients' respiratory dysfunction and spinal scoliosis made it difficult to establish muscle volumetry using underwater weighting [5] or bio-impedance analysis [4]. Muscular tissue where muscular fibers were mixed with fat also caused difficulty distinguishing between the two components using imaging methods.

An increase of signal intensity of T1 weighted images which suggested increased fat in the muscle of patients with Duchenne muscular dystrophy was reported [6], and the qualified MR grades and clinical functional grades progression were well correlated [7]. Several groups have performed muscle volumetry in patients with muscular dystrophy on either single muscle or as whole body trials, however, none of these trials included longitudinal measurements of muscle volume [8, 9].

Estimation of the concentration of fat using DIXON sequence on MRI has been reported, however, the concentration of muscle was not calculated using this method and muscle volume was not estimated [10-12]

CSA (cross sectional area analysis) [13, 14] using CT showed that the muscular cross sectional area of the middle section of the thigh corresponded well to muscle power and volume; however, accurate muscle volume could not be estimated due to the coexistence of muscle fibers and fat tissue in the same muscle bundles of patients with

Nakayama T, et al.

1  
2  
3  
4 muscular dystrophies.

5 Although the histogram of CT values in the thigh muscle showed peaks in muscle CT  
6 values in non-neuromuscular disease patients or very mild muscular dystrophy  
7 patients, the peak of the histogram shifted to fat CT values according to disease  
8 progression [15]. Intermediate CT values between fat and muscle CT values  
9 corresponded to the concentration ratio of muscle fibers and fat tissue in muscle tissue.  
10 Recently, the main object of muscle volumetry was to distinguish muscle from fat [14,  
11 15], and voxels which showed intermediate CT values were not investigated.

12  
13 The method to distinguish the two tissues by standard CT values may underestimate  
14 muscle volume, because muscle tissue which was mixed with fat tissue and  
15 represented lower CT values than standard muscle CT values were totally excluded  
16 [14] (Figure 1). The method to separate muscle from fat anatomically also did not  
17 deal with muscle tissue mixed with fat because the method was developed for healthy  
18 people or athletes [15].

19  
20 In this study, we proposed a method of estimating muscle volume in muscle tissue  
21 mixed with fat tissue using CT in patients with muscular diseases. We determined  
22 standard CT values of muscle and fat in helical CT and developed a new method to  
23 measure muscle volume using our estimation function in patients' thigh muscles,  
24 where skeletal muscle mainly contributes to daily functions, such as walking, and  
25 could be imaged easily using CT. We referred to this new method as *net* muscle  
26 volumetry. We compared results from this method to DXA analysis and the disability  
27 classification of the muscle disease. Finally, we modified the method to a long-term  
28 applicable method by calculating constant zones. In order to ascertain the usefulness  
29 of this novel method of diseased muscle volumetry, we prospectively followed 14  
30 muscular dystrophy patients and recognized progressive net muscle volume decreases  
31 over 4 years.

## 32 33 34 35 36 37 38 39 40 41 42 43 44 45 46 47 48 49 50 51 52 53 54 55 56 Subjects

### 57 58 1. Standard CT values of muscle

1  
2  
3 Abdominal CT images of 114 non-neuromuscular disease patients, who had been  
4 scanned using CT for abdominal pain using a TOSHIBA multi-detector CT  
5 scanner; Aquilion 8 and 64, aged between 20 and 30 years old (average 24 +/-  
6 3.52(SD)) were used to evaluate muscle and fat CT values at Yokohama Rosai  
7 Hospital. They were studied according to the Human Research Guidelines of the  
8 Internal Ethical Review Board of Yokohama Rosai Hospital. Abdominal organs  
9 and muscles surrounding the abdominal cavity were not obviously impaired in  
10 these images. We evaluated the CT image of constant level referred to an  
11 umbilicus of each patient.  
12  
13  
14  
15  
16  
17  
18  
19

## 20 2. Muscle volumetry using CT and DXA

21 All patients with muscular dystrophy presenting in 2007 were asked to participate  
22 our study, and thirteen patients (facioscapulohumeral muscular dystrophy (FSH):  
23 4, type I myotonic dystrophy (MyD): 6, limb-girdle muscular dystrophy (LGMD):  
24 2, inclusion body myositis (IBM): 1), (male 11, female 2) aged between 19 and 67  
25 years old (average: 52.7 +/- 14.7(SD)) participated in this study in 2007 at  
26 Yokohama Rosai Hospital, NHO Suzuka Hospital, NHO Shimoshizu Hospital,  
27 and NHO Higashisaitama Hospital. All patients were clinically or pathologically  
28 diagnosed. They were studied according to the Human Research Guidelines of  
29 the Internal Ethical Review Board of Yokohama Rosai Hospital and the National  
30 Hospital Organization. The patients gave written informed consent. Their  
31 clinical disability stage was determined on the Ueda's motor disability  
32 classification, which is widely used in patients with muscular dystrophies in Japan  
33 [16]. The original report of UEDA disability classification was published in  
34 Japanese and was not listed on PubMed database, therefore we showed the  
35 correspondence list of the UEDA functional disability stage and the leg grading  
36 scale of Vignos functional rating scale (Table 1) [17]. A priori number of  
37 patients analyzed by correlation coefficient was estimated using G\*power  
38 (<http://www.psych.uni-duesseldorf.de/abteilungen/aap/gpower3/>; effect size =  
39  
40  
41  
42  
43  
44  
45  
46  
47  
48  
49  
50  
51  
52  
53  
54  
55  
56  
57  
58  
59  
60

0.5,  $\alpha$  error probability = 0.05, power = 0.8 ), and it was presumed as 26 limbs of 13 patients.

### 3. Prospective net muscle volumetry using CT

Twelve patients (FSH: 3, MyD: 3, bulbospinal muscular atrophy: 2, IBM: 2, LGMD: 1, periodic paralysis 1), (male 9, female 3) aged between 31 and 66 years old (50.67 +/- 13.1(SD)) participated for 4 years (2007-2010) at Yokohama Rosai Hospital and NHO Suzuka Hospital. They agreed to participate in our study.

## Methods

### 1. Standard CT values of muscle

To determine standard CT values of muscle and fat, muscular CT values of paravertebral and iliopsoas muscles and fatty CT values of subcutaneous fat were obtained. ROIs were drawn at prespecified level including the whole muscle and mean ROI values were reported.

### 2a. Muscle volumetry using CT

#### *CT Data Acquisition*

Data were acquired by TOSHIBA® multi detector CT; Aquilion 8, 16 and 64 and HITACHI® multi detector CT; ROBUST (from 4 to 64 detectors). CT imaging was performed between the great trochanter and patella with a 1-cm slice thickness, 512x512 matrix, and 120 kV tube voltage.

#### *CT Analysis*

1) DICOM files between the great trochanter and patella were obtained from the image server. DICOM is a standard medical file format, and DICOM files contain patient data and images.

2) According to our standard CT values of muscle and fat, the minimum (min) standard CT value, which was the average minus 2 SD (standard deviation), and maximum (max) standard CT value, which was the average plus 2 SD, were determined for each tissue. Voxels with CT values between the min and max

standard muscle CT value and between the min and max standard fat CT value were assumed to be muscle and fat tissue, respectively. The other voxels with CT values between the max standard fat CT value and min standard muscle CT value, or between the max standard muscle CT value and max standard muscle CT value plus (the min standard muscle CT value minus max standard fat CT value) were assumed to be the complex tissue of muscle and fat, or muscle and other tissues, respectively. We estimated muscle density function as below.

$$\begin{aligned} \text{muscle ratio} &= \frac{CT \text{ value of the voxel} - (F + 2 * F\_SD)}{A} \\ &= 1 \\ &= \frac{-CT \text{ value of the voxel} + (M + 2 * M\_SD) + A}{A} \end{aligned}$$

F = mean fat CT value

M = mean muscle CT value

F\_SD = standard deviation of fat CT value

M\_SD = standard deviation of muscle CT value

A = (M - 2 \* M\_SD) - (F + 2 \* F\_SD)

M - 2 \* M\_SD = min standard muscle CT value

M + 2 \* M\_SD = max standard muscle CT value

F - 2 \* F\_SD = min standard fat CT value

F + 2 \* F\_SD = max standard fat CT value

(Figure 2)

On MATLAB®, we applied the estimated function to the DICOM image, assigned the obtained muscle density to an 8 bit scale, and wrote an 8 bit gray scale TIFF image file. (Figure 3) MATLAB® is a numerical computing

environment and programming language developed by MathWorks.

3) Obviously different structures from muscle were eliminated on the density map using Adobe Photoshop®.

4) Post processing density map files were collected on MATLAB® and muscle volume was calculated from a total summation of muscle density multiplied by voxel size. We referred to this muscle volume as net muscle volume.

## 2b. Muscle volumetry using DXA

### *DXA Data Acquisition*

Data was acquired by Lunar® pencil beam type DXA scanners (DPX-LIQ, GE Lunar) and whole body DXA scans were executed.

### *DXA Analysis*

Muscle mass was calculated from manually segmented thigh parts of data on attached software with DXA (DPX-L software Version 1.3). We calculated fat, lean mass, and bone and regarded the lean mass as the muscle mass, according to a previous report [3].

We statistically compared the two results by Pearson's correlation coefficient and Bland –Altman plot. We referred to this muscle volume calculated by our new method as net muscle volume. We also compared the Ueda's disability classification of the lower extremities of the patients to their standardized net muscle volume, which were muscle volume of thigh divided by square of body height[18], and statistically tested by Spearman's correlation coefficient.

Simultaneously the correlation between the ratio of net muscle volume divided by the distance from the trochanter to patella and the muscle square at the center of the thigh, was tested with a Pearson's correlation coefficient and regression analysis.

## 3. Prospective net muscle volumetry using CT

To compare results over several years, muscle volumes of the 14cm section of the middle part of the thigh, between 7cm above and below the midpoint of the trochanter and patella, were measured over 4 years. We performed a scan once a year over a 4 year period.



We used SPSS® 20 for statistical analysis.

## Results

### 1. Standard CT values of muscle

Standard CT values of muscle and fat were determined to be 56.3 +/- 11.3 (2 SD) and -98.3 +/- 22.8 (2 SD), respectively.

### 2. Muscle volumetry using CT and DXA

Muscle volume of the thigh on one side was calculated as between 300 and 3400 cm<sup>3</sup> by CT, and these volumes correlated to the muscle strength of these legs.

Muscle mass of the thigh calculated from DXA was also estimated at between 1100 and 5000 g. A regression line between muscle mass and muscle volume estimated that: muscle mass (g) = 1.23 x muscle volume (cm<sup>3</sup>) + 731 (g). The two results closely corresponded to one another with a Pearson's correlation coefficient of 0.993 (p=0.000), an interclass correlation coefficient (ICC(3, 1)) of 0.970, and a standard error of measurement (SEM) of 79.06 cm<sup>3</sup> in a Bland-Altman plot.

(Figure 4)

As the Ueda's disability classification of the lower extremities worsened, standardized muscle volume, which were muscle volume of thigh divided by square of body height[16], decreased with a Spearman's correlation coefficient of 0.767 (p=0.000). (Figure 5)

In addition, the ratio of muscle volume divided by the distance between the trochanter and patella was highly correlated with the muscle square at the center of the thigh, with a Pearson's correlation coefficient of 0.978 (p=0.000). A regression line between muscle volume of the thigh and central muscle area estimated that: muscle volume of the thigh (cm<sup>3</sup>) = (12.1 x central cross sectional muscle area - 9.66) x length between the great trochanter and patella

### 3. Prospective net muscle volumetry using CT

Net thigh muscle volume in 7 patients who complained of gait disturbance

Nakayama T, et al.



1  
2  
3 decreased in this period, but their functional classification was not changed. The  
4 rate of decrease was 8.54 %/year ( $p=0.000$  by a paired t-test). At this rate,  
5 reduction of muscle volume of 41.0 % would be expected over a 10 year period.  
6  
7 Net volume in 5 patients, who did not complain, did not decline ( $p=0.372$  by a  
8 paired t-test, reduction rate was 0.39 %/year).  
9  
10  
11  
12  
13

## 14 Discussion

15  
16 A method to measure muscle volume based on CT, which was validated by muscle  
17 mass calculated using DXA, was developed. In addition, we could demonstrate that  
18 the decrease of muscle volume was closely related to the aggravation of muscle  
19 functional classification. The inclination of the regression line between muscle  
20 volume from CT and muscle mass from DXA was calculated as 1.23 and represented  
21 the density of the muscle. It closely followed the specific gravity of the muscle,  
22 which was 1.17 [19], and also supported the probability of the calculation results.  
23 Demonstration of muscle volume decrease or consistency during four years also  
24 supported the reliability of this method.  
25  
26  
27  
28  
29  
30  
31  
32  
33

34 The CT scanner is a widely used imaging tool and muscle images can be obtained in  
35 a short time. Although there are problems with X-ray exposure for patients, we can  
36 scan muscle CT images of a patient who cannot keep still in MRI scanners, such as  
37 mentally retarded patients or those with claustrophobia. MRI would be preferable in  
38 children due to radiation dose. However, in adults with muscular dystrophy and a  
39 low life expectancy due to the natural course of the disease, CT might be a valuable  
40 alternative.  
41  
42  
43  
44  
45  
46  
47

48 In this study, muscle was not anatomically or manually distinguished from other  
49 tissues, but was mostly automatically differentiated with the estimating function  
50 applying CT values of image pixels. In contrast, in DXA analysis, it is easy to make  
51 an error during manual procedures of segmentation of the thigh from the trunk. It  
52 was suggested that our approximately automatic process was superior to DXA  
53 analysis. Furthermore, this method can be automated in a simple way and might  
54  
55  
56  
57  
58  
59  
60

1  
2  
3 therefore be superior to MRI evaluations, where extensive manual segmentation is  
4 necessary. This less arbitrary method is suitable for assessment of muscle volume in  
5 patients with muscular dystrophy under clinical treatment trials and will become a  
6 strong clinical outcome measure for disease progression of patients with muscular  
7 dystrophies. However, there was limitation of this net volumetry. We cannot  
8 evaluate the net muscle volume less than 300 cm<sup>3</sup>, because in the images of the  
9 patients whose net muscle volumes under 300 cm<sup>3</sup>, muscle tissue was almost changed  
10 to fat.  
11

12  
13 In this prospective *net* muscle volumetry, we calculated a 14cm section of the  
14 middle part of the thigh, between 7cm above and below the midpoint of the trochanter  
15 and patella, thereby minimizing spatial errors. For muscle volume, when measuring  
16 all sections between the trochanter and patella, the elimination of genital organs and  
17 tendons may lead to manual errors between examiners. On repeated examination, a  
18 difference in the number of slices between scans may occur, and a difference in the  
19 number of slices may cause fluctuations in muscle volume by several percentage (1/30  
20 - 1/20, i.e. 3-5 %). On the other hand, the summation of a few slices will lead to  
21 positional differences between scans; therefore, we confirmed the number of slices as  
22 much as possible from our experiences. In addition, we decided to calculate the  
23 sections, because the diameter of the thigh was not so different between upper and  
24 bottom slices at the middle part of the thigh.  
25

26  
27 Slice thickness was determined as 10 mm similarly to cadaver thigh MRI and CT  
28 scans [20] and proportionally to 3 mm slice thickness in mice volumetry using CT  
29 [21]. To minimize manual procedures, the numbers of slices should be reduced and  
30 slice thickness should be as thick as possible.  
31

32  
33 We determined the estimating linear function in the form of linear symmetry and as  
34 a median with muscle CT values on the histogram of CT values of images, because  
35 muscle and fat peaks on the histogram of CT values of non-muscular disease patients  
36 seemed to be normally distributed [22].  
37

38  
39 Although decreases or consistencies in net muscle volume were measured by our  
40

1  
2  
3 method, the accurate separation of muscle from connective tissue was impossible for  
4 the similar CT values of muscle and connective tissue. It was supposed that muscle  
5 tissue experiences fatty changes, but intramuscular connective tissue may not  
6 significantly increase within a year.  
7  
8  
9

10  
11 In addition, for child patients, evaluation of disease progression will be estimated by  
12 the residual muscle ratio: net muscle volume divided by net muscle volume +  
13 intrafascial fat volume in the middle part of the thigh, where muscle cross sectional  
14 area (CSA) was closely correlated to muscle volume of the thigh [14].  
15  
16  
17

18 Finally, as muscle volume was different between patients according to their height,  
19 weight, and other factors, muscle volumes must be used not for comparison between  
20 patients, but as an index of the efficacy of therapies or of the progression of disease in  
21 one patient.  
22  
23  
24  
25  
26  
27

### 28 Acknowledgements

29  
30 This study was supported by Research Program on Neurological Diseases of  
31 the Japan Ministry of Health, Labour, and Welfare, grant number (20B-12).  
32  
33  
34

35  
36 (3033 words)  
37  
38  
39  
40  
41  
42  
43  
44  
45  
46  
47  
48  
49  
50  
51  
52  
53  
54  
55  
56  
57  
58  
59  
60

**Data sharing**

No additional data available

**Competing Interests**

T Nakayama, S Kuru, Y Motoyoshi and M Kawai didn't receive any research support fees from TANITA Body Weight Scientific Institute.

**Funding**

None

**Contributorship**

T Nakayama, S Kuru, Y Motoyoshi and M Kawai contributed to all of this study.

M Okura contributed to the muscle volumetry using DXA.

## References

- 1) Chowdhury B, Sjostrom L, Alpsten M, et al.; A multicompartiment body composition technique base on computed tomography. *Int J Obes Relat Metab Disord.* 18: 219-234, 1994
- 2) Lönn L, Starck G, Alpsten M, et al.; Determination of tissue volumes. A comparison between CT and MR imaging. *Acta Radiol.* 40: 314-321, 1999
- 3) Heymsfield SB, Smith R, Aulet M, et al.; Appendicular skeletal muscle mass: measurement by dual-photon absorptiometry. *Am J Clin Nutr* 52: 214-218, 1990
- 4) Miyatani M, Kanehisa H, Masuo Y, et al.; Validity of estimating limb muscle volume by bioelectrical impedance. *J Appl Physiol* 91: 386-394, 2001
- 5) Brodie DA; Techniques of measurement of body composition. Part I. *Sports Med* 5: 11-40, 1988
- 6) Garrood P, Hollingsworth KG, Eagle M, et.al.; MR imaging in Duchenne muscular dystrophy: quantification of T1-weighted signal, contrast uptake, and the effects of exercise. *J Magn Reson Imaging* 30: 1130-8, 2009
- 7) Liu GC, Jong YJ, Chiang CH, et.al.; Duchenne muscular dystrophy: MR grading system with functional correlation. *Radiology* 186: 475-80, 1993
- 8) Hsieh TJ, Wang CK, Chuang HY, et.al; In vivo proton magnetic resonance spectroscopy assessment for muscle metabolism in neuromuscular diseases. *J Pediatr.* 151: 319-21, 2007
- 9) Gong QY, Phoenix J, Kemp GJ, et.al; Estimation of body composition in muscular dystrophy by MRI and stereology. *J Magn Reson Imaging.* 12: 467-75, 2000
- 10) Wren TAL, Bluml S, Tseng-Ong L, et.al. ; Three-point technique of fat quantification of muscle tissue as a marker of disease progression in Duchenne muscular dystrophy: preliminary study. *AJR* 190: W8–W12, 2008
- 11) Fischmann A, Hafner P, Gloor M, et.al.; Quantitative MRI and loss of free ambulation in Duchenne muscular dystrophy. *J Neurol.* 260: 969-74, 2013
- 12) Wokke BH, Bos C, Reijnierse M, et.al.; Comparison of dixon and T1-weighted MR methods to assess the degree of fat infiltration in duchenne muscular dystrophy

Nakayama T, et al.

- patients. *J Magn Reson Imaging*. 2013 Jan 4. doi:10.1002/jmri.23998.
- 13) Maughan RJ, Watson JS, Weir J; Strength and cross-sectional area of human skeletal muscle. *J Physiol* 338: 37-49, 1983
  - 14) Liu M, Chino N, Ishihara T; Muscle damage progression in Duchenne muscular dystrophy evaluated by a new quantitative computed tomography method. *Arch Phys Med Rehabil* 74: 507-514, 1993
  - 15) Tames-Pena J, Parker KJ, Totterman S; Unsupervised statistical segmentation of multispectral volumetric MR images. *Proceedings of SPIE – The international Society for Optical Engineering Medical Imaging '99. Image Processing 3661: 300-311, 1999*
  - 16) Shimizu J, Matsumura K, Kawai M, et.al.; X-ray CT of Duchenne muscular dystrophy skeletal muscles--chronological study for five years. *Rinsho Shinkeigaku*. 31: 953-9, 1991
  - 17) Vignos PJ, Archibald KC; Maintenance of ambulation in childhood muscular dystrophy. *Chronic Dis*. 12: 273-90, 1960
  - 18) Baumgartner R, Koehler K, Gallagher D, et al.; Epidemiology of sarcopenia among the elderly in New Mexico. *Am J Epidemiol* 147: 755-763, 1998
  - 19) Melanie GU, Elisa BP, Loree KK, et al.; Specific fore deficit in skeletal muscle of old rats is partially explained by the existence of denervated muscle fibers. *J Gerontol A Biol Sci Med Sci* 56: B191-B197, 2001
  - 20) Mitsiopoulos N, Baumgartner RN, Heymsfield SB, et al.; Cadaver validation of skeletal muscle measurement by magnetic resonance imaging and computerized tomography. *J Appl Physiol* 85: 115-122, 1998
  - 21) Ross R, Leger L, Guardo R, et al.; Adipose tissue volume measurement by magnetic resonance imaging and computerized tomography in rats. *J Appl Physiol* 70: 2164-2172, 1991
  - 22) Nakayama T, Kuru S, Kawai M; Analysis using histograms of muscle CT images in patients with Duchenne muscular dystrophy. *BMJ Case Reports* 2013; doi:10.1136/bcr-2013-009301

| Ueda's motor disability classification based on Japanese lifestyle |                                                                                                     | The leg grading scale of Vignos functional rating scale |                                                                                                    |
|--------------------------------------------------------------------|-----------------------------------------------------------------------------------------------------|---------------------------------------------------------|----------------------------------------------------------------------------------------------------|
| Stage 1                                                            | Able to walk: Able to climb the stairs without assistance (without using a handrail)                | Grade 1                                                 | Walks and climbs stairs without assistance.                                                        |
| Stage 2                                                            | Assistance (e.g., handrail) is necessary for climbing the stairs.                                   | Grade 2                                                 | Walks and climbs stairs with aid of railing.                                                       |
|                                                                    |                                                                                                     | Grade 3.                                                | Walks and climbs stairs slowly with aid of railing (over 25 seconds for eight standard steps).     |
| Stage 3                                                            | Unable to climb stairs: able to walk on a flat surface: able to stand up from a normal-height chair | Grade 4                                                 | Walks unassisted but cannot climb stairs or get out of chair.                                      |
| Stage 4                                                            | Able to walk on a flat surface: unable to stand up from a chair                                     | Grade 5                                                 | Walks unassisted but cannot rise from chair or climb stairs.                                       |
| Stage 5                                                            | Unable to walk: able to crawl on four limbs                                                         | Grade 6                                                 | Walks only with assistance or walks independently with long leg braces.                            |
| Stage 6                                                            | Unable to crawl on four limbs but able to crawl in another pattern                                  | Grade 7                                                 | Walks in long leg braces but requires assistance for balance.                                      |
| Stage 7                                                            | Unable to crawl but able to maintain a sitting position by oneself                                  | Grade 8                                                 | Stands in long leg braces but unable to walk even with assistance.                                 |
| Stage 8                                                            | Unable to maintain a sitting position by oneself; total assistance is necessary                     | Grade 9                                                 | Wheelchair or bed bound; can only perform limited activities involving lower arm and hand muscles. |

Table 1: Ueda's motor disability classification based on Japanese lifestyle and the leg grading scale of Vignos functional rating scale



## Figure Legends

### Figure 1: Estimation of muscle volume using only standard CT values

The voxels, whose CT values were between 40 and 65, were estimated for muscle tissue according to a previously reported method [7]. This patient with progressive muscular dystrophy was able to walk with a cane, but he would be unable to according to this presumed muscle tissue image by the previous method.

### Figure 2: Estimation of muscle volume from voxels

This figure showed an estimation of muscle volume from voxels where muscle and fat coexists. CT values of voxels, composed of muscle and fat, depended on the ratio of the two components. The histogram showed CT values of the thigh, and the two peaks of fat and muscle were shown. At a CT value of -75, the pixel included 0% muscle, and at a CT value of 45, the pixel included 100% muscle. The two points were connected with a linear function, this was then fit to the histogram, and, as a result, muscle density was obtained. This linear function was linearly symmetrically transferred to the other side of the muscle peak of the CT value.

### Figure 3: Process of calculating muscle volume

These images were calculated from DIOOM data. Muscle is shown. We deleted obvious vessels and skin tissues manually from the density map, resulting in a muscle volume map of the thigh. Accumulation of outcomes resulted in muscle volume.

### Figure 4: Correlation between muscle volumes calculated from CT and muscle mass from DXA

Results from DXA and CT are plotted. These results corresponded well with a Pearson's correlation coefficient of 0.993, interclass correlation coefficient (ICC(3,1)) of 0.970. The regression line was; muscle volume (CT) = 0.80 x muscle mass (DXA) - 561 (cm<sup>3</sup>), muscle mass (DXA) = 1.23 x muscle volume (CT) + 731 (g), Bland Altman plot between the results of the regression function substituted by muscle

Nakayama T, et al.



1  
2  
3 mass from DXA and the muscle volume calculated from CT showed no additional nor  
4 proportional error and a standard error of measurement(SEM) of 79.06 cm<sup>3</sup>.  
5  
6  
7

8  
9 Figure 5: Correlation between muscle volume and disability stage  
10

11 As Ueda's disability classification based on Japanese style in the lower extremities  
12 deteriorates, standardized muscle volume (muscle volume divided by square of body  
13 height) decreases with a Spearman's correlation coefficient of 0.767. The leg grading  
14 scale of Vignos functional rating scale was also shown.  
15  
16  
17  
18  
19

20  
21 Figure 6: Prospective net muscle volumetry in four years  
22

23 During these four years, thigh muscle volumes in 7 patients who complained of gait  
24 disturbance decreased in this period (p=0.000). The rate of decrease was at a rate of  
25 8.54 % / year. The volume in 5 patients, who did not complain, did not decline  
26 significantly (p=0.372). Samples of muscle density map of both patients who  
27 complain gait disturbance and who don't complain about gait disturbance were shown  
28 at the right side.  
29  
30  
31  
32  
33  
34  
35  
36  
37  
38  
39  
40  
41  
42  
43  
44  
45  
46  
47  
48  
49  
50  
51  
52  
53  
54  
55  
56  
57  
58  
59  
60

1  
2  
3  
4  
5  
6  
7  
8  
9  
10  
11  
12  
13  
14  
15  
16  
17  
18  
19  
20  
21  
22  
23  
24  
25  
26  
27  
28  
29  
30  
31  
32  
33  
34  
35  
36  
37  
38  
39  
40  
41  
42  
43  
44  
45  
46  
47  
48  
49  
50  
51  
52  
53  
54  
55  
56  
57  
58  
59  
60

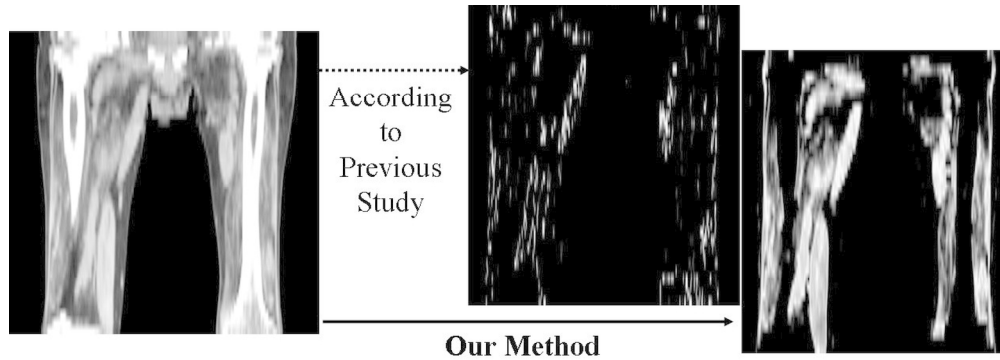

Estimation of muscle volume using only standard CT values

The voxels, whose CT values were between 40 and 65, were estimated for muscle tissue according to a previously reported method [7]. This patient with progressive muscular dystrophy was able to walk with a cane, but he would be unable to according to this presumed muscle tissue image by the previous method.  
337x122mm (300 x 300 DPI)

er review only

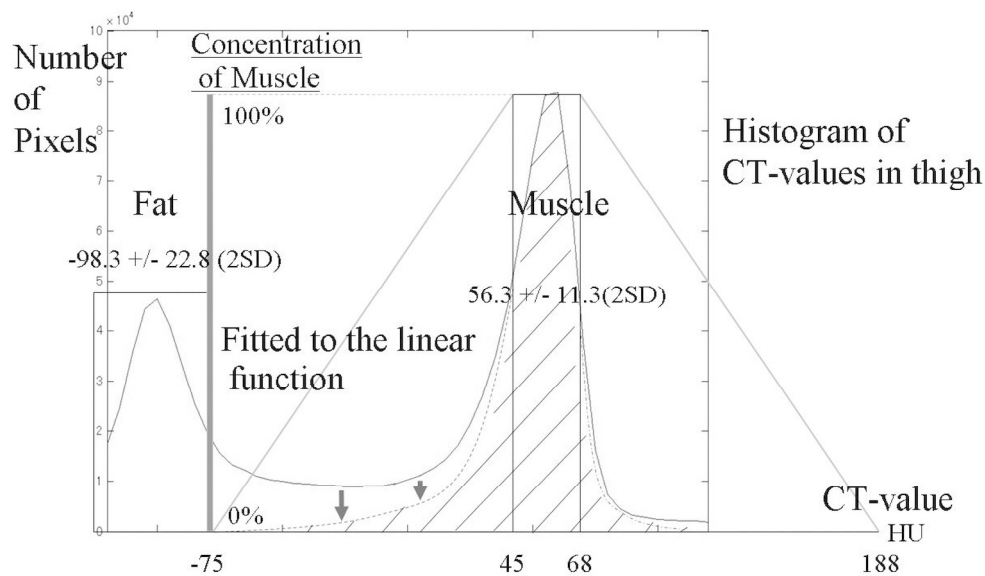

Estimation of muscle volume from voxels

This figure showed an estimation of muscle volume from voxels where muscle and fat coexists. CT values of voxels, composed of muscle and fat, depended on the ratio of the two components. The histogram showed CT values of the thigh, and the two peaks of fat and muscle were shown. At a CT value of -75, the pixel included 0% muscle, and at a CT value of 45, the pixel included 100% muscle. The two points were connected with a linear function, this was then fit to the histogram, and, as a result, muscle density was obtained. This linear function was linearly symmetrically transferred to the other side of the muscle peak of the CT value.

325x192mm (300 x 300 DPI)

1  
2  
3  
4  
5  
6  
7  
8  
9  
10  
11  
12  
13  
14  
15  
16  
17  
18  
19  
20  
21  
22  
23  
24  
25  
26  
27  
28  
29  
30  
31  
32  
33  
34  
35  
36  
37  
38  
39  
40  
41  
42  
43  
44  
45  
46  
47  
48  
49  
50  
51  
52  
53  
54  
55  
56  
57  
58  
59  
60

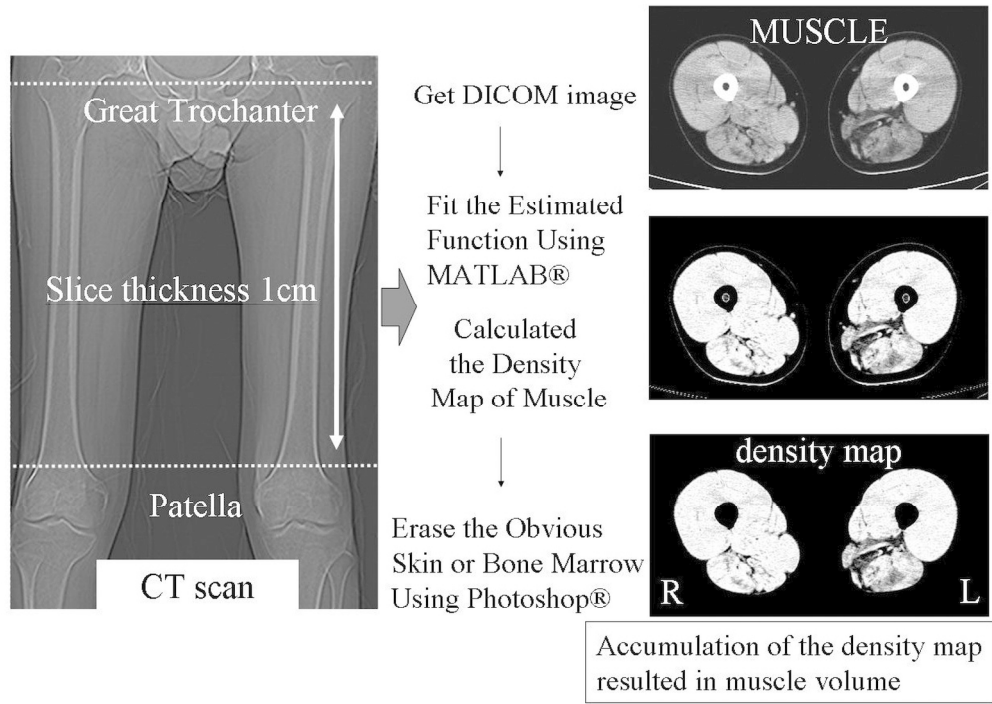

Process of calculating muscle volume

These images were calculated from DIOOM data. Muscle is shown. We deleted obvious vessels and skin tissues manually from the density map, resulting in a muscle volume map of the thigh. Accumulation of outcomes resulted in muscle volume.

329x233mm (300 x 300 DPI)

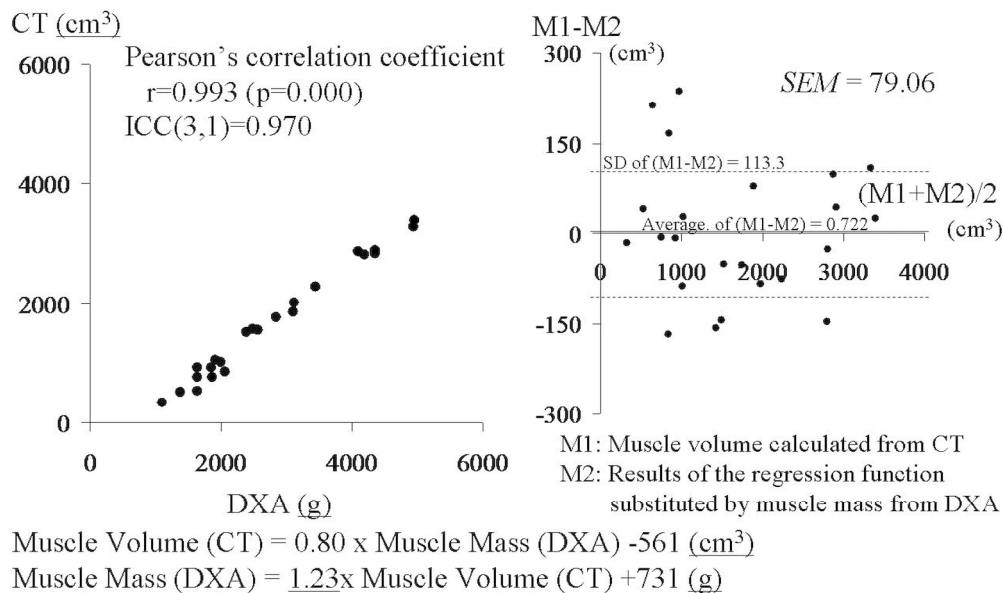

Correlation between muscle volumes calculated from CT and muscle mass from DXA

Results from DXA and CT are plotted. These results corresponded well with a Pearson's correlation coefficient of 0.993, interclass correlation coefficient (ICC(3,1)) of 0.970. The regression line was; muscle volume (CT) =  $0.80 \times$  muscle mass (DXA) -  $561$  (cm<sup>3</sup>), muscle mass (DXA) =  $1.23 \times$  muscle volume (CT) +  $731$  (g), Bland Altman plot between the results of the regression function substituted by muscle mass from DXA and the muscle volume calculated from CT showed no additional nor proportional error and a standard error of measurement (SEM) of  $79.06$  cm<sup>3</sup>.

338x202mm (300 x 300 DPI)

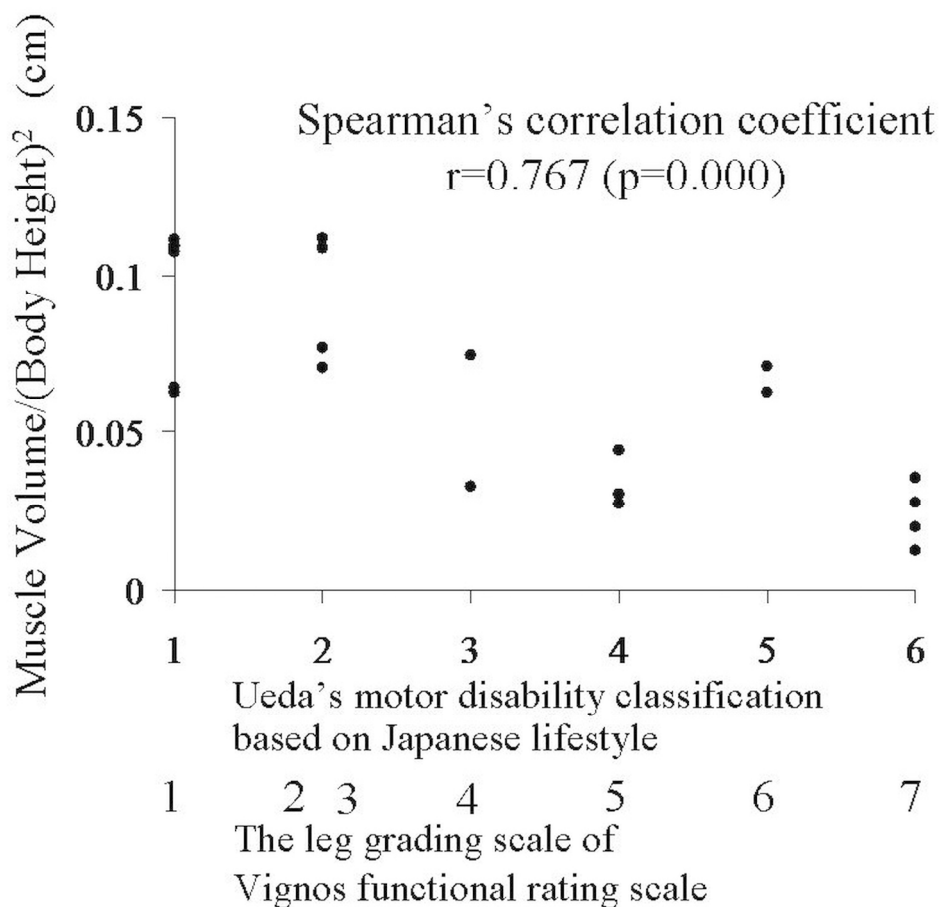

Correlation between muscle volume and disability stage

As Ueda's disability classification based on Japanese style in the lower extremities deteriorates, standardized muscle volume (muscle volume divided by square of body height) decreases with a Spearman's correlation coefficient of 0.767. The leg grading scale of Vignos functional rating scale was also shown.

214x202mm (300 x 300 DPI)

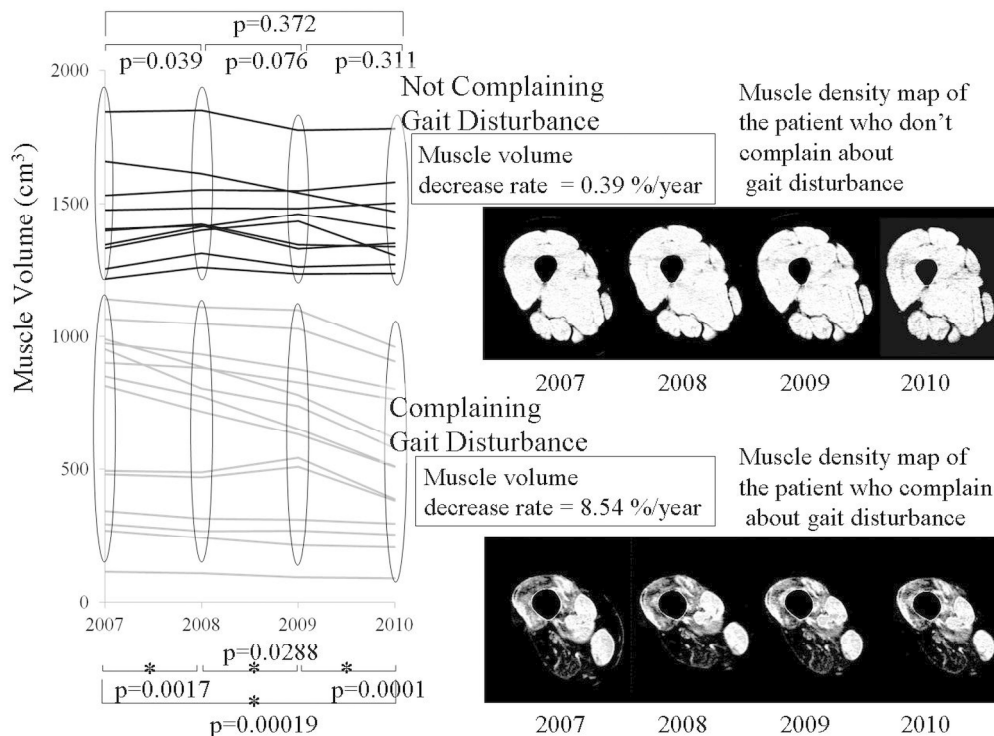

Prospective net muscle volumetry in four years

During these four years, thigh muscle volumes in 7 patients who complained of gait disturbance decreased in this period ( $p=0.000$ ). The rate of decrease was at a rate of 8.54 % / year. The volume in 5 patients, who did not complain, did not decline significantly ( $p=0.372$ ). Samples of muscle density map of both patients who complain gait disturbance and who don't complain about gait disturbance were shown at the right side.

338x253mm (300 x 300 DPI)

Only

TITLE: Measurement Estimation of net muscle volume in patients with muscular dystrophy using muscle CT for prospective muscle volume analysis: observation study

## AUTHORS:

T. Nakayama, M.D. <sup>\*)</sup>, S. Kuru, M.D. <sup>\*\*)</sup>, M. Okura, M.Sci. <sup>\*\*\*)</sup>,  
Y. Motoyoshi, M.D. <sup>\*\*\*\*)</sup>, M. Kawai, M.D. <sup>\*\*\*\*\*)</sup>

<sup>\*)</sup> Department of Neurology, Yokohama Rosai Hospital.

3211, Kozukue, Kouhoku-ku, Yokohama, Kanagawa 222-0036, Japan

<sup>\*\*)</sup> Department of Neurology, NHO Suzuka Hospital, Japan,

<sup>\*\*\*)</sup> TANITA Body Weight Scientific Institute, Japan,

<sup>\*\*\*\*)</sup> Department of Neurology, NHO Shimoshizu Hospital, Japan,

<sup>\*\*\*\*\*)</sup> Department of Neurology, NHO Higashisaitama Hospital, Japan

Telephone : +81-45-474-8111

Fax : +81-45-474-8110

E-mail; [tnakayama-tky@umin.ac.jp](mailto:tnakayama-tky@umin.ac.jp)

## Key Words:

muscular dystrophy, muscle volumetry, outcome measure, CT, DXA

Word Count ~~2490~~3033 words

References: ~~16~~22

Figures: 6, Table: 1

All correspondence should be sent to T. Nakayama addressed above.

Nakayama T, et al.



## Abstract

### Objectives:

÷

Muscle volume in patients with muscle disease is an index of disease progression. The aim of this study is to show a new method of muscle volumetry using CT of thigh muscles.

### Design:

#### Observation study

### Participants:

#### Subjects

1. For muscle volumetry using CT and DXA, 13 patients with muscle disease participated.
2. For prospective CT volumetry, 12 patients participated for 4 years.

### Primary and secondary outcome measures:

To establish the new CT volumetry, whose results were correlated to the muscle mass measured by calculated from DXA (primary outcome). To show the decrease of muscle volume using our method during over 4 years (secondary outcome)

### Methods:

1.a. ~~Helical CT scanner~~-imaging of the thigh was performed. CT images were analyzed applying estimated functions, and the accumulation of outcomes resulted in muscle volumes. We refer to this method as net muscle volumetry.

#### Simultaneously,-

1.b. ~~Pencil beam~~-DXA was used in these patients and the muscle mass of the thigh was calculated by ~~the attached vendor provided~~ software.

2. ~~To prospectively compare muscle volumes, CT images of the mid-thigh were~~

Nakayama T, et al.

~~measured. We referred to this method as net muscle volumetry. To evaluate longitudinal changes of muscle volumes, net muscle volumetry at 14-cm section of the middle part of thigh was~~ performed repeatedly over a 4 years period.

Formatted: Font: No underline

#### Results:

1. ~~a.~~ Muscle volumes of the thigh on one side were calculated as between 300 and 3400 cm<sup>3</sup> by CT.
1. ~~b.~~ Muscle masses of the thigh calculated from DXA were estimated at between 1100 and 5000 g. ~~These Results~~ results closely corresponded to ~~each other~~ muscle volumes calculated by CT with ~~Pearson's~~ interclass correlation coefficient of 0.993.
2. Thigh net muscle volumes of 7 patients who complained of gait disturbance decreased ~~in~~ over four years ( $p < 0.01$ ).

#### Conclusions:

Measurement of net muscle volume using CT, which was validated by the muscle mass calculated from DXA, was developed. Net muscle volume decrements ~~during~~ over four years supported the reliability of this method. This less arbitrary method is suitable for assessment of muscle volume in patients with muscular dystrophy.

(~~250~~ 300 words)

Nakayama T, et al.

## Article Summary

### Article focus

- ✓ Muscle volume in patients with muscle disease is an index of disease progression and the efficacy of therapy, but muscle volumetry in which the muscle volume decreases could be shown in the patients with muscular dystrophies during several years has not been conducted ~~thusse~~ far.
- ✓ There were some reports which showed estimated muscle volume were correlated to muscle power or functional rating scale in patients with muscular dystrophy using CT, MRI and DXA(dual energy X-ray absorptiometry).
- ✓ We proposed a method of muscle volumetry using our own estimating function to muscle CT images in patients with muscular diseases. And we demonstrated the long-term applicable method by calculating constant zones. And we called our method as net muscle volumetry.
- ✓ We measured muscle volume in patients' thigh muscles, where skeletal muscle mainly contributes to daily functions, using net muscle volumetry.

Formatted: Bullets and Numbering

### Key messages

- ✓ The muscle volume ~~using-calculated by~~ our method, ~~that is net muscle volumetry~~, are closely correlated to the muscle mass using DXA, and the decrement of muscle volume are corresponded to the aggravation of muscle functional classification. These findings validated our method.
- ✓ We demonstrated the net muscle volume decrease or consistency ~~during-over~~ four years, and that also supported the reliability of this method.
- ✓ In this study, muscle was mostly automatically differentiated with the estimating function applying CT values of image pixels, except for manual elimination of skin or vessels. . This less arbitrary method is suitable for assessment of muscle volume in patients with muscular dystrophy under clinical treatment trials and will become a strong clinical outcome measure for disease progression.

### Strengths and limitations of this study

- ✓ CT are capable of acquiring muscle images of all patients within a short time, and

Nakayama T, et al.

are adaptable to patients who cannot keep still in MRI scanners, such as mentally retarded patients or those with claustrophobia.

~~✓We refer to the results as net muscle volume, because we calculated a 14cm section of the middle part of the thigh.—~~

- ✓ There are problems with X-ray exposure to patients
- ✓ We cannot evaluate the net muscle volume less than 300 cm<sup>3</sup>.
- ✓ We cannot distinguish muscle from connective tissue accurately.

### Introduction

Muscle volume in patients with muscle disease is an index of disease progression and the efficacy of therapy. Although muscle volume can be measured in healthy people using CT [1], MRI [2], DXA (dual energy X-ray absorptiometry) [3], and bio-impedance analysis [4], muscle volumetry in patients with muscular dystrophies has not been conducted.

Patients' respiratory dysfunction and spinal scoliosis made it difficult to establish muscle volumetry using underwater weighting [5] or bio-impedance analysis [4]. Muscular tissue where muscular fibers were mixed with fat also caused difficulty distinguishing between the two components using imaging methods.

An increase of signal intensity of T1 weighted images which suggested increased fat in the muscle of patients with Duchenne muscular dystrophy was reported [6].—

~~aAnd the qualified MR grades and clinical functional grades progression were well correlated [7].—Several groups have performed muscle volumetry in patients with muscular dystrophy on either single muscle or as whole body trials, however, none of these trials included longitudinal measurements of muscle volume [8, 9].—~~

~~Hsieh et al. In vivo proton magnetic resonance spectroscopy assessment for muscle metabolism in neuromuscular diseases. J Pediatr (2007) vol. 151 (3) pp. 319-21~~

~~Gong et al. Estimation of body composition in muscular dystrophy by MRI and stereology. Journal of magnetic resonance imaging - JMIRI (2000) vol. 12 (3) pp.~~

Nakayama T, et al.

Formatted

Formatted

Formatted: Font: (Default) Times New Roman, 14 pt

Formatted: Indent: First line: 0.5 ch

Formatted: Font: (Default) Times New Roman, 14 pt

6

~~467-75~~~~but the muscle volumetry, in which the muscle volume decrement were shown in the patients with muscular dystrophies during several years, were not established.—~~

Estimation of the concentration of fat using DIXON sequence on MRI has been reported, however, the concentration of muscle was not calculated using this method and muscle volume was not estimated [8-10,12]

CSA (cross sectional area analysis) [13, 14] using CT showed that the muscular cross sectional area of the middle section of the thigh corresponded well to muscle power and volume; however, accurate muscle volume could not be estimated due to the coexistence of muscle fibers and fat tissue in the same muscle bundles of patients with muscular dystrophies.

Although the histogram of CT values in the thigh muscle showed peaks in muscle CT values in non-neuromuscular disease patients or very mild muscular dystrophy patients, the peak of the histogram shifted to fat CT values according to disease progression [15]. Intermediate CT values between fat and muscle CT values corresponded to the concentration ratio of muscle fibers and fat tissue in muscle tissue. Recently, the main object of muscle volumetry was to distinguish muscle from fat [14, 15], and voxels which showed intermediate CT values were not investigated.

The method to distinguish the two tissues by standard CT values may underestimate muscle volume, because muscle tissue which was mixed with fat tissue and represented lower CT values than standard muscle CT values were totally excluded [14] (Figure 1). The method to separate muscle from fat anatomically also did not deal with muscle tissue mixed with fat because the method was developed for healthy people or athletes [15].

In this study, we proposed a method of estimating muscle volume in muscle tissue mixed with fat tissue using CT in patients with muscular diseases. We determined standard CT values of muscle and fat in helical CT and developed a new method to measure muscle volume using our estimation function in patients' thigh muscles,

Nakayama T, et al.

Formatted: Font: (Default) Times New Roman, 14 pt

Formatted

Formatted: Indent: First line: 0 ch, Line spacing: single, Hyphenate, Don't adjust space between Latin and Asian text, Don't adjust space between Asian text and numbers

where skeletal muscle mainly contributes to daily functions, such as walking, and could be imaged easily using CT. We referred to this new method as *net muscle volumetry*. We compared results from this ~~new~~ method to DXA analysis and the disability classification of the muscle disease. Finally, we modified the method to a long-term applicable method by calculating constant zones. ~~As we limited the calculating partition and the results were not accurate thigh muscle volumes, we referred to this method as *net muscle volumetry*.~~ In order to ascertain the usefulness of this novel method of diseased muscle volumetry, we prospectively followed 14 muscular dystrophy patients and recognized progressive net muscle volume decreases over 4 years.

## Subjects

### 1. Standard CT values of muscle

~~2.~~

2. Abdominal CT images of 114 non-neuromuscular disease patients, who had been scanned using CT for abdominal pain using a TOSHIBA multi-detector CT scanner: Aquilion 8 and 64, aged between 20 and 30 years old (average 24 +/- 3.52(SD)) were used to evaluate muscle and fat CT values ~~at~~ Yokohama Rosai Hospital. They were studied according to the Human Research Guidelines of the Internal Ethical Review Board of Yokohama Rosai Hospital. Abdominal organs and muscles surrounding the abdominal cavity were not obviously impaired in these images. We evaluated the CT image of constant level referred referred to an umbilicus of each patient. –

### 2. Muscle volumetry using CT and DXA

~~The section that an umbilicus was included in was evaluated.~~

### 2. Muscle volumetry using CT and DXA

All patients with muscular dystrophy presenting in 2007 were asked to participate our study, and ~~Thirteen~~ thirteen patients (facioscapulohumeral muscular dystrophy (FSH): 4, type I myotonic dystrophy (MyD): 6, limb-girdle muscular dystrophy

Nakayama T, et al.

Formatted: Bullets and Numbering

Formatted: Indent: Left: 0.34", No bullets or numbering

Formatted: Numbered + Level: 1 + Numbering Style: 1, 2, 3, ... + Start at: 1 + Alignment: Left + Aligned at: 0" + Tab after: 0.34" + Indent at: 0.34"

Formatted: No bullets or numbering

Formatted: Bullets and Numbering

(LGMD): 2, inclusion body myositis (IBM): 1), (male 11, female 2) aged between 19 and 67 years old (average: 52.7 +/- 14.7(SD)) participated in this study in 2007 at Yokohama Rosai Hospital, NHO Suzuka Hospital, NHO Shimoshizu Hospital, and NHO Higashisaitama Hospital. All patients were clinically or pathologically diagnosed. They were studied according to the Human Research Guidelines of the Internal Ethical Review Board of Yokohama Rosai Hospital and the National Hospital Organization. ~~The patients gave written informed consent. They agreed to this study and assigned with their signature.~~ Their clinical disability stage was determined on the Ueda's motor disability classification, which ~~was~~ widely used in patients with muscular dystrophies in Japan [1416]. The original report of UEDA disability classification was published in Japanese and was not listed on PubMed database, therefore we showed the correspondence list of the UEDA functional disability stage and the leg grading scale of Vignos functional rating scale (Table 1) [1517]. A priori number of patients analyzed by correlation coefficient was estimated using G\*power (<http://www.psych.uni-duesseldorf.de/abteilungen/aap/gpower3/>; effect size = 0.5,  $\alpha$  error probability = 0.05, power = 0.8 ), and it was presumed as 26 limbs of 13 patients.

#### 4.3. Prospective net muscle volumetry using CT

Twelve patients (FSH: 3, MyD: 3, bulbospinal muscular atrophy: 2, IBM: 2, LGMD: 1, periodic paralysis 1), (male 9, female 3) aged between 31 and 66 years old (50.67 +/- 13.1(SD)) participated for 4 years (2007-2010) at Yokohama Rosai Hospital and NHO Suzuka Hospital. They ~~also~~ agreed to participate in our study.

## Methods

### 1. Standard CT values of muscle

To determine standard CT values of muscle and fat, muscular CT values of

Nakayama T, et al.

paravertebral and iliopsoas muscles and fatty CT values of subcutaneous fat were obtained. ROIs were drawn at prespecified level including the whole muscle and mean ROI values were reported.

## 2a. Muscle volumetry using CT

### *CT Data Acquisition*

Data were acquired by TOSHIBA® multi detector CT; Aquilion 8, 16 and 64 and HITACHI® multi detector CT; ROBUST scanners (from 4 to 64 detectors). CT imaging was performed between the great trochanter and patella with a 1-cm slice thickness, 512x512 matrix, and 120 kV tube voltage.

### *CT Analysis*

1) DICOM files between the great trochanter and patella were obtained from the image server. DICOM is a standard medical file format, and DICOM files contain patient data and images.

2) According to our standard CT values of muscle and fat, the minimum (min) standard CT value, which was the average minus 2 SD (standard deviation), and maximum (max) standard CT value, which was the average plus 2 SD, were determined for each tissue. Voxels with CT values between the min and max standard muscle CT value and between the min and max standard fat CT value were assumed to be muscle and fat tissue, respectively. The other voxels with CT values between the max standard fat CT value and min standard muscle CT value, or between the max standard muscle CT value and max standard muscle CT value plus (the min standard muscle CT value minus max standard fat CT value) were assumed to be the complex tissue of muscle and fat, or muscle and other tissues, respectively. We estimated muscle density function as below.

Nakayama T, et al.



10

$$\begin{aligned} \text{muscle ratio} &= \frac{CT \text{ value of the voxel} - (F + 2 * F\_SD)}{A} \\ & \quad ((F + 2 * F\_SD) \leq CT \text{ value of the voxel} < (M - 2 * M\_SD)) \\ &= 1 \\ & \quad ((M - 2 * M\_SD) \leq CT \text{ value of the voxel} < (M + 2 * M\_SD)) \\ &= \frac{-CT \text{ value of the voxel} + (M + 2 * M\_SD) + A}{A} \\ & \quad ((M + 2 * M\_SD) \leq CT \text{ value of the voxel} < ((M + 2 * M\_SD) + A)) \end{aligned}$$

F = mean fat CT value

M = mean muscle CT value

F\_SD = standard deviation of fat CT value M\_SD = standard deviation of muscle CT value

A = (M - 2 \* M\_SD) - (F + 2 \* F\_SD)

M - 2 \* M\_SD = min standard muscle CT value

M + 2 \* M\_SD = max standard muscle CT value

F - 2 \* F\_SD = min standard fat CT value

F + 2 \* F\_SD = max standard fat CT value

$$\begin{aligned} \text{muscle ratio} &= \frac{CT \text{ value of the voxel} - \text{max standard fat CT value}}{A} \\ \text{muscle ratio} &= \frac{CT \text{ value of the voxel} + \text{standard muscle CT value} + A}{A} \end{aligned}$$

(Figure 2)

Formatted: Font: 12 pt

Formatted: Font: 12 pt

On MATLAB®, we applied the estimated function to the DICOM image, assigned the obtained muscle density to an 8 bit scale, and wrote an 8 bit gray scale TIFF image file. -(Figure 3) [MATLAB® is a numerical computing environment and programming language developed by MathWorks.](#)

3) Obviously different structures from muscle were eliminated on the density map using Adobe Photoshop®.

4) Post processing density map files were collected on MATLAB® and muscle

Nakayama T, et al.

1  
2  
3  
4  
5  
6  
7  
8  
9  
10  
11  
12  
13  
14  
15  
16  
17  
18  
19  
20  
21  
22  
23  
24  
25  
26  
27  
28  
29  
30  
31  
32  
33  
34  
35  
36  
37  
38  
39  
40  
41  
42  
43  
44  
45  
46  
47  
48  
49  
50  
51  
52  
53  
54  
55  
56  
57  
58  
59  
60

volume was calculated from a total summation of muscle density multiplied by voxel size. We referred to this muscle volume as net muscle volume.

## 2b. Muscle volumetry using DXA

### *DXA Data Acquisition*

Data ~~weasre~~ acquired by Lunar® pencil beam type DXA scanners (DPX-LIQ, GE Lunar) and whole body DXA scans ~~wereas~~ executed.

### *DXA Analysis*

Muscle mass was calculated from manually segmented thigh parts of data on attached software with DXA (DPX-L software Version 1.3). We calculated fat, lean mass, and bone and regarded the lean mass as the muscle mass, according to a previous report [3].

—We statistically compared the two results by Peason’s correlation coefficient and Bland –Altman plot. We referred to this muscle volume calculated by our new method as net muscle volume. We also compared the Ueda’s disability classification of the lower extremities of the patients to their standardized net muscle volume, which were muscle volume of thigh divided by square of body height[1618], and statistically tested by Spearman’s correlation coefficient. Simultaneously the correlation between the ratio of net muscle volume divided by the distance from the trochanter to patella and the muscle square at the center of the thigh, was tested with a Pearson’s correlation coefficient and regression analysis.

Formatted: Indent: Left 1.35 ch

Formatted: Font: English (U.S.)

## 3. Prospective net muscle volumetry using CT

To compare results over several years, muscle volumes of the 14cm section of the middle part of the thigh, between 7cm above and below the midpoint of the trochanter and patella, were measured ~~for over~~ 4 years. We performed a scan once a year over a 4 year period. We referred to this volume as net muscele-volume.

We used SPSS® 20 for statistical analysis.

Nakayama T, et al.

## Results

### 1. Standard CT values of muscle

Standard CT values of muscle and fat were determined to be 56.3 +/- 11.3 (2 SD) and -98.3 +/- 22.8 (2 SD), respectively.

### 2. Muscle volumetry using CT and DXA

Muscle volume of the thigh on one side was calculated as between 300 and 3400 cm<sup>3</sup> by CT, and these volumes correlated to the muscle strength of these legs.

Muscle mass of the thigh calculated from DXA was also estimated at between 1100 and 5000 g. A regression line between muscle mass and muscle volume estimated that: muscle mass (g) = 1.23 x muscle volume (cm<sup>3</sup>) + 731 (g). The two results closely corresponded to one another with a Pearson's correlation coefficient of 0.993 (p=0.000), an interclass correlation coefficient (ICC(3, 1)) of 0.970, and a standard error of measurement (SEM) of 79.06 cm<sup>3</sup> in a Bland-Altman plot.

(Figure 4)

As the Ueda's disability classification of the lower extremities worsened, standardized muscle volume, which were muscle volume of thigh divided by square of body height[16], decreased with a Spearman's correlation coefficient of 0.767 (p=0.000). (Figure 5)

In addition, the ratio of muscle volume divided by the distance between the trochanter and patella was highly correlated with the muscle square at the center of the thigh, with a Pearson's correlation coefficient of 0.978 (p=0.000). A regression line between muscle volume of the thigh and central muscle area estimated that: muscle volume of the thigh (cm<sup>3</sup>) = (12.1 x central cross sectional muscle area - 9.66) x length between the great trochanter and patella

### 3. Prospective net muscle volumetry using CT

Net thigh muscle volume in 7 patients who complained of gait disturbance decreased in this period, but their functional classification was not changed. --

The rate of decrease was 8.54 %/year (p=0.000 by a paired t-test). At This-this

Nakayama T, et al.

rate, reduction of muscle volume of ~~led to a~~ 41.0 % would be expected over a 10 year period~~reduction in muscle volume in ten years~~. Net volume in 5 patients, who did not complain, did not decline ( $p=0.372$  by a paired t-test, reduction rate was 0.39 %/year).

## Discussion

A method to measure muscle volume based on CT, which was validated by muscle mass calculated using DXA, was developed. In addition, we could demonstrate ~~also validated this method~~ that the decrease of muscle volume was closely related to the aggravation of muscle functional classification. The inclination of the regression line between muscle volume from CT and muscle mass from DXA was calculated as 1.23 and represented the density of the muscle. It closely followed the specific gravity of the muscle, which was 1.17 [[1719](#)], and also supported the probability of the calculation results. Demonstration of muscle volume decrease or consistency during four years also supported the reliability of this method.

The CT scanner is a widely used imaging tool and muscle images can be obtained in a short time. Although there are problems with X-ray exposure for patients, we can scan muscle CT images of a patient who cannot keep still in MRI scanners, such as mentally retarded patients or those with claustrophobia. MRI would be preferable in children due to radiation dose. However, in adults with muscular dystrophy and a low life expectancy due to the natural course of the disease, CT might be a valuable alternative.

In this study, muscle was not anatomically or manually distinguished from other tissues, but was mostly automatically differentiated with the estimating function applying CT values of image pixels. In contrast, in DXA analysis, it is easy to make an error during manual procedures of segmentation of the thigh from the trunk. It was suggested that our approximately automatic process was superior to DXA analysis. Furthermore, this method can be automated in a simple way and might therefore be superior to MRI evaluations, where extensive manual segmentation is

Nakayama T, et al.

necessary. This less arbitrary method is suitable for assessment of muscle volume in patients with muscular dystrophy under clinical treatment trials and will become a strong clinical outcome measure for disease progression of patients with muscular dystrophies. However, there was limitation of this net volumetry. We cannot evaluate the net muscle volume less than 300 cm<sup>3</sup>, because in the images of the patients whose net muscle volumes s under 300 cm<sup>3</sup>, muscle tissue was almost changed to fat.

In this prospective *net* muscle volumetry, we calculated a 14cm section of the middle part of the thigh, between 7cm above and below the midpoint of the trochanter and patella, thereby minimizing spatial errors. For muscle volume, when measuring all sections between the trochanter and patella, the elimination of genital organs and tendons may lead to manual errors between examiners. On repeated examination, a difference in the number of slices between scans may occur, and a difference in the number of slices may cause fluctuations in muscle volume by several percentage (1/30 - 1/20, i.e. 3-5 %). On the other hand, the summation of a few slices will lead to positional differences between scans; therefore, we confirmed the number of slices as much as possible from our experiences. In addition, we decided to calculate the sections, because the diameter of the thigh was not so different between upper and bottom slices at the middle part of the thigh.

Slice thickness was determined as 10 mm similarly to cadaver thigh MRI and CT scans [1820] and proportionally to 3 mm slice thickness in mice volumetry using CT [1921]. To minimize manual procedures, the numbers of slices should be reduced and slice thickness should be as thick as possible.

We determined the estimating linear function in the form of linear symmetry and as a median with muscle CT values on the histogram of CT values of images, because muscle and fat peaks on the histogram of CT values of non-muscular disease patients seemed to be normally distributed [2022].

Although decreases or consistencies in net muscle volume were measured by our method, the accurate separation of muscle from connective tissue was impossible for

Nakayama T, et al.

1  
2  
3  
4  
5  
6  
7  
8 the similar CT values of muscle and connective tissue. It was supposed that muscle  
9 tissue experiences fatty changes, but intramuscular connective tissue may not  
10 significantly increase within a year.  
11

12 In addition, for child patients, evaluation of disease progression will be estimated by  
13 the residual muscle ratio: net muscle volume divided by net muscle volume +  
14 intrafascial fat volume in the middle part of the thigh, where muscle cross sectional  
15 area (CSA) was closely correlated to muscle volume of the thigh [1214].  
16

17 Finally, as muscle volume was different between patients according to their height,  
18 weight, and other factors, muscle volumes must be used not for comparison between  
19 patients, but as an index of the efficacy of therapies or of the progression of disease in  
20 one patient.  
21  
22  
23  
24  
25  
26

#### 27 Acknowledgements

28 This study was supported by Research Program on Neurological Diseases of  
29 the Japan Ministry of Health, Labour, and Welfare, grant number (20B-12).  
30  
31  
32

33  
34 (2882-3033 words)  
35  
36  
37  
38  
39  
40  
41  
42  
43  
44  
45  
46  
47  
48  
49  
50  
51  
52  
53  
54

55 Nakayama T, et al.  
56  
57  
58  
59  
60

## References

- 1) Chowdhury B, Sjostrom L, Alpsten M, et al.; A multicompartiment body composition technique base on computed tomography. *Int J Obes Relat Metab Disord.* 18: 219-234, 1994
- 2) Lönn L, Starck G, Alpsten M, et al.; Determination of tissue volumes. A comparison between CT and MR imaging. *Acta Radiol.* 40: 314-321, 1999
- 3) Heymsfield SB, Smith R, Aulet M, et al.; Appendicular skeletal muscle mass: measurement by dual-photon absorptiometry. *Am J Clin Nutr* 52: 214-218, 1990
- 4) Miyatani M, Kanehisa H, Masuo Y, et al.; Validity of estimating limb muscle volume by bioelectrical impedance. *J Appl Physiol* 91: 386-394, 2001
- 5) Brodie DA; Techniques of measurement of body composition. Part I. *Sports Med* 5: 11-40, 1988
- 6) Garrood P, Hollingsworth KG, Eagle M, et.al.; MR imaging in Duchenne muscular dystrophy: quantification of T1-weighted signal, contrast uptake, and the effects of exercise. *J Magn Reson Imaging* 30: 1130-8, 2009
- 7) Liu GC, Jong YJ, Chiang CH, et.al.; Duchenne muscular dystrophy: MR grading system with functional correlation. *Radiology* 186: 475-80, 1993
- 7) Hsieh TJ, Wang CK, Chuang HY, et al; In vivo proton magnetic resonance spectroscopy assessment for muscle metabolism in neuromuscular diseases. *J Pediatr.* 151: 319-21, 2007
- 7) Gong QY, Phoenix J, Kemp GJ, et.al; Estimation of body composition in muscular dystrophy by MRI and stereology. *J Magn Reson Imaging.* 12: 467-75, 2000
- 8) Wren TAL, Bluml S, Tseng-Ong L, et.al. ; Three-point technique of fat quantification of muscle tissue as a marker of disease progression in Duchenne muscular dystrophy: preliminary study. *AJR* 190: W8–W12, 2008
- 9) Fischmann A, Hafner P, Gloor M, et.al.; Quantitative MRI and loss of free ambulation in Duchenne muscular dystrophy. *J Neurol.* 260: 969-74, 2013

Nakayama T, et al.

Formatted: Bullets and Numbering

Formatted: Line spacing: 1.5 lines, Numbered + Level: 1 + Numbering Style: 1, 2, 3, ... + Start at: 1 + Alignment: Left + Aligned at: 0" + Tab after: 0.25" + Indent at: 0.25", Don't hyphenate, Adjust space between Latin and Asian text, Adjust space between Asian text and numbers

Formatted: Bullets and Numbering

- ~~10~~12) Wokke BH, Bos C, Reijnierse M, et.al.; Comparison of dixon and T1-weighted MR methods to assess the degree of fat infiltration in duchenne muscular dystrophy patients. J Magn Reson Imaging. 2013 Jan 4. doi:10.1002/jmri.23998.
- ~~11~~13) Maughan RJ, Watson JS, Weir J; Strength and cross-sectional area of human skeletal muscle. J Physiol 338: 37-49, 1983
- ~~12~~14) Liu M, Chino N, Ishihara T; Muscle damage progression in Duchenne muscular dystrophy evaluated by a new quantitative computed tomography method. Arch Phys Med Rehabil 74: 507-514, 1993
- ~~13~~15) Tames-Pena J, Parker KJ, Totterman S; Unsupervised statistical segmentation of multispectral volumetric MR images. Proceedings of SPIE – The international Society for Optical Engineering Medical Imaging '99. Image Processing 3661: 300-311, 1999
- ~~14~~16) Shimizu J, Matsumura K, Kawai M, et.al.; X-ray CT of Duchenne muscular dystrophy skeletal muscles--chronological study for five years. Rinsho Shinkeigaku. 31: 953-9, 1991
- ~~15~~17) Vignos PJ, Archibald KC; Maintenance of ambulation in childhood muscular dystrophy. Chronic Dis. 12: 273-90, 1960
- ~~16~~18) Baumgartner R, Koehler K, Gallagher D, et al.; Epidemiology of sarcopenia among the elderly in New Mexico. Am J Epidemiol 147: 755-763, 1998
- ~~17~~19) Melanie GU, Elisa BP, Loree KK, et al.; Specific fore deficit in skeletal muscle of old rats is partially explained by the existence of denervated muscle fibers. J Gerontol A Biol Sci Med Sci 56: B191-B197, 2001
- ~~18~~20) Mitsiopoulos N, Baumgartner RN, Heymsfield SB, et al.; Cadaver validation of skeletal muscle measurement by magnetic resonance imaging and computerized tomography. J Appl Physiol 85: 115-122, 1998
- Ross R, Leger L, Guardo R, et al.; Adipose tissue volume measurement by magnetic resonance imaging and computerized tomography in rats. J Appl Physiol 70: 2164-2172, 1991

21)

Nakayama T, et al.

Formatted: Numbered + Level: 1 + Numbering Style: 1, 2, 3, ... + Start at: 1 + Alignment: Left + Aligned at: 0" + Tab after: 0.25" + Indent at: 0.25"

Formatted: Bullets and Numbering



18

1  
2  
3  
4  
5  
6  
7  
8 —Nakayama T, Kuru S, Kawai M; Analysis using histograms of muscle CT images in  
9 patients with Duchenne muscular dystrophy. BMJ Case Reports 2013;  
10 doi:10.1136/bcr-2013-009301  
11  
12 22)

Formatted: Numbered + Level: 1 + Numbering  
Style: 1, 2, 3, ... + Start at: 1 + Alignment: Left +  
Aligned at: 0" + Tab after: 0.25" + Indent at:  
0.25"

Formatted: Font:

Formatted: Bullets and Numbering

For peer review only

13  
14  
15  
16  
17  
18  
19  
20  
21  
22  
23  
24  
25  
26  
27  
28  
29  
30  
31  
32  
33  
34  
35  
36  
37  
38  
39  
40  
41  
42  
43  
44  
45  
46  
47  
48  
49  
50  
51  
52  
53  
54  
55  
56 Nakayama T, et al.  
57  
58  
59  
60

| Ueda's motor disability classification based on Japanese lifestyle |                                                                                                     | The leg grading scale of Vignos functional rating scale |                                                                                                    |
|--------------------------------------------------------------------|-----------------------------------------------------------------------------------------------------|---------------------------------------------------------|----------------------------------------------------------------------------------------------------|
| Stage 1                                                            | Able to walk: Able to climb the stairs without assistance (without using a handrail)                | Grade 1                                                 | Walks and climbs stairs without assistance.                                                        |
| Stage 2                                                            | Assistance (e.g., handrail) is necessary for climbing the stairs.                                   | Grade 2                                                 | Walks and climbs stairs with aid of railing.                                                       |
|                                                                    |                                                                                                     | Grade 3                                                 | Walks and climbs stairs slowly with aid of railing (over 25 seconds for eight standard steps).     |
| Stage 3                                                            | Unable to climb stairs: able to walk on a flat surface: able to stand up from a normal-height chair | Grade 4                                                 | Walks unassisted but cannot climb stairs or get out of chair.                                      |
| Stage 4                                                            | Able to walk on a flat surface: unable to stand up from a chair                                     | Grade 5                                                 | Walks unassisted but cannot rise from chair or climb stairs.                                       |
| Stage 5                                                            | Unable to walk: able to crawl on four limbs                                                         | Grade 6                                                 | Walks only with assistance or walks independently with long leg braces.                            |
| Stage 6                                                            | Unable to crawl on four limbs but able to crawl in another pattern                                  | Grade 7                                                 | Walks in long leg braces but requires assistance for balance.                                      |
| Stage 7                                                            | Unable to crawl but able to maintain a sitting position by oneself                                  | Grade 8                                                 | Stands in long leg braces but unable to walk even with assistance.                                 |
| Stage 8                                                            | Unable to maintain a sitting position by oneself; total assistance is necessary                     | Grade 9                                                 | Wheelchair or bed bound; can only perform limited activities involving lower arm and hand muscles. |

Table 1: Ueda's motor disability classification based on Japanese lifestyle and the leg grading scale of Vignos functional rating scale

Nakayama T, et al.

## Figure Legends

### Figure 1: Estimation of muscle volume using only standard CT values

The voxels, whose CT values were between 40 and 65, were estimated for muscle tissue according to a previously reported method [7]. This patient with progressive muscular dystrophy was able to walk with a cane, but he would be unable to ~~could not~~ walk obviously in according to this presumed muscle tissue image by the previous method. -

### Figure 2: Estimation of muscle volume from voxels

This figure showed an estimation of muscle volume from voxels where muscle and fat coexists. CT values of voxels, composed of muscle and fat, depended on the ratio of the two components. The histogram showed CT values of the thigh, and the two peaks of fat and muscle were shown. At a CT value of -75, the pixel included 0% muscle, and at a CT value of 45, the pixel included 100% muscle. The two points were connected with a linear function, this was then fit to the histogram, and, as a result, muscle density was obtained. This linear function was linearly symmetrically transferred to the other side of the muscle peak of the CT value.

### Figure 3: Process of calculating muscle volume

These images were calculated from DIOOM data. Muscle is shown. We deleted obvious vessels and skin tissues manually from the density map, resulting in a muscle volume map of the thigh. Accumulation of outcomes resulted in muscle volume.

### Figure 4: Correlation between muscle volumes calculated from CT and muscle mass from DXA

Results from DXA and CT are plotted. These results corresponded well with a Pearson's correlation coefficient of 0.993, interclass correlation coefficient (ICC(3,1)) of 0.970. The regression line was; muscle volume (CT) = 0.80 x muscle mass (DXA) - 561 (cm<sup>3</sup>), muscle mass (DXA) = 1.23 x muscle volume (CT) + 731 (g),

Nakayama T, et al.

Bland Altman plot between the results of the regression function substituted by muscle mass from DXA and the muscle volume calculated from CT showed no additional nor proportional error and a standard error of measurement(SEM) of 79.06 cm<sup>3</sup>.

Figure 5: Correlation between muscle volume and disability stage

As Ueda's disability classification based on Japanese style in the lower extremities deteriorates, standardized muscle volume (muscle volume divided by square of body height) decreases with a Spearman's correlation coefficient of 0.767. The leg grading scale of Vignos functional rating scale was also shown.

Figure 6: Prospective net muscle volumetry in four years

During these four years, thigh muscle volumes in 7 patients who complained of gait disturbance decreased in this period (p=0.000). The rate of decrease was at a rate of 8.54 % / year. The volume in 5 patients, who did not complain, did not decline significantly (p=0.372). [Samples of muscle density map of both patients who complain gait disturbance and who don't complain about gait disturbance were shown at the right side.](#)

Nakayama T, et al.

## STROBE Statement—checklist of items that should be included in reports of observational studies

|                              | Item No | Recommendation                                                                                                                                                                                                                                                                                                                                                                                                                                                                                                                                                                                                                                                                                   |
|------------------------------|---------|--------------------------------------------------------------------------------------------------------------------------------------------------------------------------------------------------------------------------------------------------------------------------------------------------------------------------------------------------------------------------------------------------------------------------------------------------------------------------------------------------------------------------------------------------------------------------------------------------------------------------------------------------------------------------------------------------|
| <b>Title and abstract</b>    | 1       | (a) Indicate the study's design with a commonly used term in the title or the abstract<br>(b) Provide in the abstract an informative and balanced summary of what was done and what was found                                                                                                                                                                                                                                                                                                                                                                                                                                                                                                    |
| <b>Introduction</b>          |         |                                                                                                                                                                                                                                                                                                                                                                                                                                                                                                                                                                                                                                                                                                  |
| Background/rationale         | 2       | Explain the scientific background and rationale for the investigation being reported                                                                                                                                                                                                                                                                                                                                                                                                                                                                                                                                                                                                             |
| Objectives                   | 3       | State specific objectives, including any prespecified hypotheses                                                                                                                                                                                                                                                                                                                                                                                                                                                                                                                                                                                                                                 |
| <b>Methods</b>               |         |                                                                                                                                                                                                                                                                                                                                                                                                                                                                                                                                                                                                                                                                                                  |
| Study design                 | 4       | Present key elements of study design early in the paper                                                                                                                                                                                                                                                                                                                                                                                                                                                                                                                                                                                                                                          |
| Setting                      | 5       | Describe the setting, locations, and relevant dates, including periods of recruitment, exposure, follow-up, and data collection                                                                                                                                                                                                                                                                                                                                                                                                                                                                                                                                                                  |
| Participants                 | 6       | (a) <i>Cohort study</i> —Give the eligibility criteria, and the sources and methods of selection of participants. Describe methods of follow-up<br><i>Case-control study</i> —Give the eligibility criteria, and the sources and methods of case ascertainment and control selection. Give the rationale for the choice of cases and controls<br><i>Cross-sectional study</i> —Give the eligibility criteria, and the sources and methods of selection of participants<br>(b) <i>Cohort study</i> —For matched studies, give matching criteria and number of exposed and unexposed<br><i>Case-control study</i> —For matched studies, give matching criteria and the number of controls per case |
| Variables                    | 7       | Clearly define all outcomes, exposures, predictors, potential confounders, and effect modifiers. Give diagnostic criteria, if applicable                                                                                                                                                                                                                                                                                                                                                                                                                                                                                                                                                         |
| Data sources/<br>measurement | 8*      | For each variable of interest, give sources of data and details of methods of assessment (measurement). Describe comparability of assessment methods if there is more than one group                                                                                                                                                                                                                                                                                                                                                                                                                                                                                                             |
| Bias                         | 9       | Describe any efforts to address potential sources of bias                                                                                                                                                                                                                                                                                                                                                                                                                                                                                                                                                                                                                                        |
| Study size                   | 10      | Explain how the study size was arrived at                                                                                                                                                                                                                                                                                                                                                                                                                                                                                                                                                                                                                                                        |
| Quantitative variables       | 11      | Explain how quantitative variables were handled in the analyses. If applicable, describe which groupings were chosen and why                                                                                                                                                                                                                                                                                                                                                                                                                                                                                                                                                                     |
| Statistical methods          | 12      | (a) Describe all statistical methods, including those used to control for confounding<br>(b) Describe any methods used to examine subgroups and interactions<br>(c) Explain how missing data were addressed<br>(d) <i>Cohort study</i> —If applicable, explain how loss to follow-up was addressed<br><i>Case-control study</i> —If applicable, explain how matching of cases and controls was addressed<br><i>Cross-sectional study</i> —If applicable, describe analytical methods taking account of sampling strategy<br>(e) Describe any sensitivity analyses                                                                                                                                |

Continued on next page

1  
2  
3  
4  
5  
6  
7  
8  
9  
10  
11  
12  
13  
14  
15  
16  
17  
18  
19  
20  
21  
22  
23  
24  
25  
26  
27  
28  
29  
30  
31  
32  
33  
34  
35  
36  
37  
38  
39  
40  
41  
42  
43  
44  
45  
46  
47  
48  
49  
50  
51  
52  
53  
54  
55  
56  
57  
58  
59  
60

| <b>Results</b>           |                                                                                                                                                                                                                                                                                                                                                                                                                  |
|--------------------------|------------------------------------------------------------------------------------------------------------------------------------------------------------------------------------------------------------------------------------------------------------------------------------------------------------------------------------------------------------------------------------------------------------------|
| Participants             | 13* (a) Report numbers of individuals at each stage of study—eg numbers potentially eligible, examined for eligibility, confirmed eligible, included in the study, completing follow-up, and analysed<br>(b) Give reasons for non-participation at each stage<br>(c) Consider use of a flow diagram                                                                                                              |
| Descriptive data         | 14* (a) Give characteristics of study participants (eg demographic, clinical, social) and information on exposures and potential confounders<br>(b) Indicate number of participants with missing data for each variable of interest<br>(c) <i>Cohort study</i> —Summarise follow-up time (eg, average and total amount)                                                                                          |
| Outcome data             | 15* <i>Cohort study</i> —Report numbers of outcome events or summary measures over time<br><i>Case-control study</i> —Report numbers in each exposure category, or summary measures of exposure<br><i>Cross-sectional study</i> —Report numbers of outcome events or summary measures                                                                                                                            |
| Main results             | 16 (a) Give unadjusted estimates and, if applicable, confounder-adjusted estimates and their precision (eg, 95% confidence interval). Make clear which confounders were adjusted for and why they were included<br>(b) Report category boundaries when continuous variables were categorized<br>(c) If relevant, consider translating estimates of relative risk into absolute risk for a meaningful time period |
| Other analyses           | 17 Report other analyses done—eg analyses of subgroups and interactions, and sensitivity analyses                                                                                                                                                                                                                                                                                                                |
| <b>Discussion</b>        |                                                                                                                                                                                                                                                                                                                                                                                                                  |
| Key results              | 18 Summarise key results with reference to study objectives                                                                                                                                                                                                                                                                                                                                                      |
| Limitations              | 19 Discuss limitations of the study, taking into account sources of potential bias or imprecision. Discuss both direction and magnitude of any potential bias                                                                                                                                                                                                                                                    |
| Interpretation           | 20 Give a cautious overall interpretation of results considering objectives, limitations, multiplicity of analyses, results from similar studies, and other relevant evidence                                                                                                                                                                                                                                    |
| Generalisability         | 21 Discuss the generalisability (external validity) of the study results                                                                                                                                                                                                                                                                                                                                         |
| <b>Other information</b> |                                                                                                                                                                                                                                                                                                                                                                                                                  |
| Funding                  | 22 Give the source of funding and the role of the funders for the present study and, if applicable, for the original study on which the present article is based                                                                                                                                                                                                                                                 |

\*Give information separately for cases and controls in case-control studies and, if applicable, for exposed and unexposed groups in cohort and cross-sectional studies.

**Note:** An Explanation and Elaboration article discusses each checklist item and gives methodological background and published examples of transparent reporting. The STROBE checklist is best used in conjunction with this article (freely available on the Web sites of PLoS Medicine at <http://www.plosmedicine.org/>, Annals of Internal Medicine at <http://www.annals.org/>, and Epidemiology at <http://www.epidem.com/>). Information on the STROBE Initiative is available at [www.strobe-statement.org](http://www.strobe-statement.org).
